# Supplementary material for: Rh(iii)-catalyzed redox-neutral C–H activation/annulation of oxadiazolones with sulfoxonium ylides to access oxadiazoloisoquinolinone
Source: Royal Society of Chemistry journal article supplement (doi:10.1039/d4nj05391e), 2025-01-01
Supplement: d4nj05391e1.pdf [file d4nj05391e1.pdf]

## Supporting Information

### **Rh(III)-Catalyzed Redox-Neutral C–H Activation/Annulation of Oxadiazolones with Sulfoxonium Ylides to access oxadiazoloisoquinolinone**

Pothapragada SK Prabhakar Ganesh,<sup>‡a</sup> Eswaran Kamaraj,<sup>‡b</sup> Vairaperumal Veeramani,<sup>c</sup> Rajaram Rajmohan,<sup>\*d</sup> Muthuraja Perumal,<sup>\*d</sup>

<sup>a</sup> Department of Chemistry, Indian Institute of Science Education and Research (IISER), Tirupati, 517 507, India.

<sup>b</sup> Department of Chemistry, Yeungnam University, Gyeongsan 38541, Republic of Korea.

<sup>c</sup> Organic Chemistry Division, Syngene International Limited, Bangalore, Karnataka, 560 099, India,

<sup>d</sup> School of Chemical Engineering, Yeungnam University, Gyeongsan 38541, Republic of Korea.

E-mail: [pmuthuraja.chem@yu.ac.kr](mailto:pmuthuraja.chem@yu.ac.kr) ; [rajmohanau@yu.ac.kr](mailto:rajmohanau@yu.ac.kr)

## TABLE OF CONTENTS

|     |                                                                             |    |
|-----|-----------------------------------------------------------------------------|----|
| 1.0 | General remarks                                                             | 03 |
| 2.0 | General procedure for the synthesis of compound <b>3a</b>                   | 05 |
| 2.1 | General procedure for the synthesis of compound <b>3a</b> (1 mmol scale)    | 05 |
| 3.0 | Control experiments                                                         | 06 |
| 3.1 | Competitive experiment between the oxadiazolones                            | 07 |
| 3.2 | Competitive experiment between the sulfoxonium ylide                        | 07 |
| 4.0 | <sup>1</sup> H NMR and <sup>13</sup> C NMR spectra of synthesized compounds | 08 |
| 4.1 | <sup>1</sup> H NMR and <sup>13</sup> C NMR spectra of synthesized spectrum  | 15 |
| 5.1 | Experimental procedure for anti-inflammatory activity                       | 39 |
| 5.2 | Anti-diabetic activity $\alpha$ -amylase inhibition technique               | 39 |
| 6.0 | References                                                                  | 40 |

## 1.0 General remarks

All chemicals were obtained from commercial sources and were used as received unless otherwise noted. All the required anhydrous solvents were purchased from Sigma Aldrich. Reactions were monitored using precoated Aluminum supported silica gel 60 F254 TLC (thin layer chromatography) plates (Merck) and are visualized by UV light at 254 nm. All the final products were purified using column chromatography (100-200 mesh silica gel purchased from Merck). <sup>1</sup>H NMR (400 MHz), <sup>19</sup>F NMR (376 MHz), and <sup>13</sup>C NMR (100 MHz) spectra were recorded on the Bruker AVANCE NEO 400 MHz spectrometer. Deuterated chloroform, DMSO-d<sub>6</sub> were used as solvents, and Chemical shifts ( $\delta$ ) for <sup>1</sup>H and <sup>13</sup>C-NMR spectra are given in ppm relative to tetramethylsilane (TMS) [ $\delta$  7.27 for <sup>1</sup>H (chloroform-d),  $\delta$  77.0 for <sup>13</sup>C (chloroform-d);  $\delta$  2.50 for <sup>1</sup>H (DMSO- d<sub>6</sub>),  $\delta$  39.52 for <sup>13</sup>C (DMSO-d<sub>6</sub>)], <sup>19</sup>F-NMR spectra are not externally calibrated and chemical shifts are given relative to CCl<sub>3</sub>F as received from automatic data processing. Abbreviations used in the NMR follow-up experiments: br, broad; s, singlet; d, doublet; t, triplet; q, quartet; sep, septet; dd, doublet of doublet; m, multiplet. High resolution mass spectra (HRMS) were obtained from Orbitrap Elite HybridIon Trap-Orbitrap (ThermoFischer scientific, Newington, NH, USA) Mass Spectrometer in electrospray ionization mode (ESI+) and Agilent Bio-QTOF-6545XT high resolution mass spectrometer in electrospray ionization mode (ESI+). X-ray data for the compound was collected on a Bruker D8 VENTURE diffractometer instrument with an I $\mu$ S 3.0 Mo source ( $\lambda = 0.7107 \text{ \AA}$ ) and a PHOTON-III C28 detector.

Sulfoxonium ylides<sup>1</sup> (**2a-2p**), and 1,2,4-oxadiazol-5(2H)-one<sup>2</sup> (**1a-1k**) were prepared according to the literature procedures.

**Table S1:** Sulfoxonium ylides

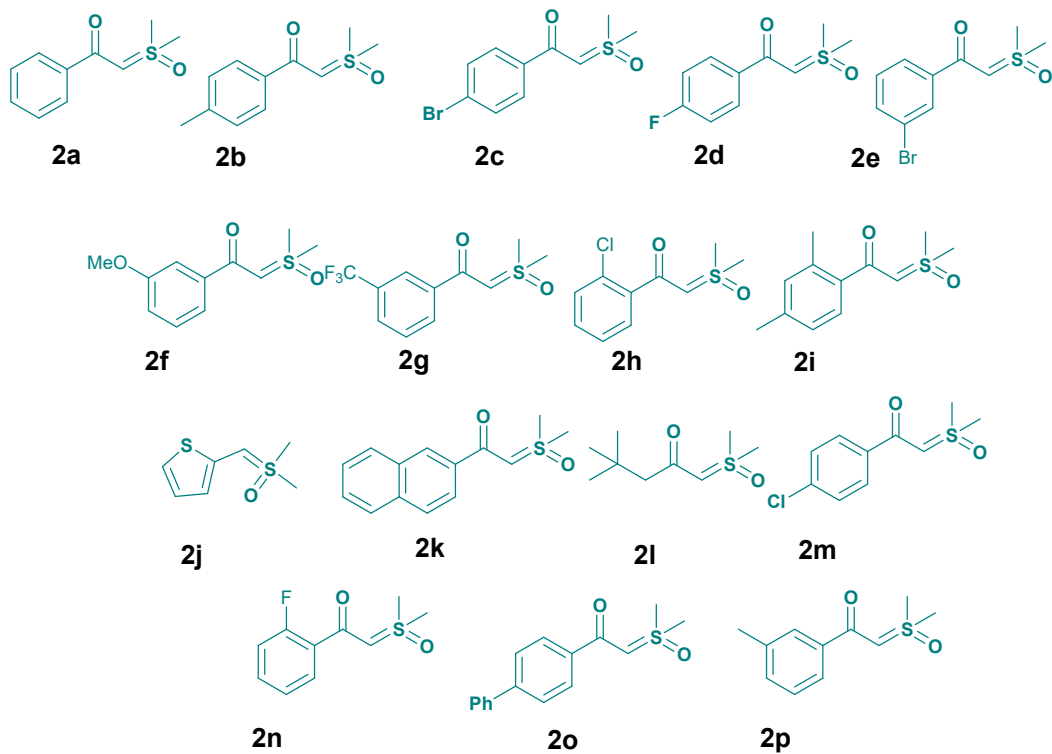

**Table S2:** Synthesized 1,2,4-oxadiazol-5(2H)-one

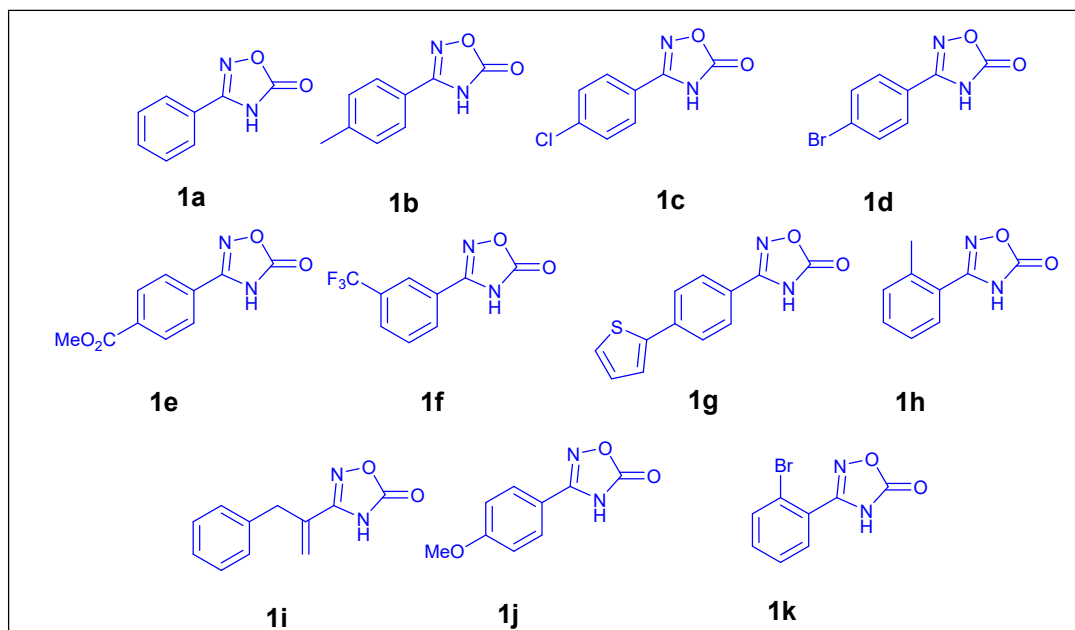

## 2 Experimental section

### 2.0 General procedure for the synthesis of compound **3a**

In a 10-mL screw cap reaction vial, 3-(*p*-tolyl)-1,2,4-oxadiazol-5(4H)-one **1b** (18.0 mg, 0.1 mmol), phenyl sulfoxonium ylide **2a** (43.2 mg, 0.22 mmol), zinc acetate (18.3 mg, 0.1 mmol), [RhCp\*Cl<sub>2</sub>]<sub>2</sub> (1.23 mg, 2 mol%), Agsbf<sub>6</sub> (6.9 mg, 20 mol%), and 1.0 mL DCE were added. Then the reaction mixture was sealed with a screw cap after flushing with nitrogen and placed in oil bath at 100 °C. The reaction mixture was stirred at the same temperature for 12 h. After completion of the reaction (monitored by TLC), the reaction mixture was cooled to room temperature, filtered through a short silica gel bed (100-200 mesh), and concentrated under vacuum. The crude product was purified on a flash column chromatography using hexane/ethyl acetate (8:2) to afford the desired product **3a** in 30.12 mg, 73% yield.

### 2.1 Representative 4 mmol scale synthesis of (**3a**)

In a 25-mL screw cap reaction vial, 3-(*p*-tolyl)-1,2,4-oxadiazol-5(4H)-one **1b** (180 mg, 1.0 mmol), phenyl sulfoxonium ylide **1a** (432 mg, 2.2 mmol), zinc acetate (183 mg, 1.0 mmol), [RhCp\*Cl<sub>2</sub>]<sub>2</sub> (12.3 mg, 2 mol%), Agsbf<sub>6</sub> (69 mg, 20 mol%), and 10 mL DCE were added. Then the reaction mixture was sealed with a screw cap after flushing with nitrogen and placed in oil bath at 100 °C. The reaction mixture was stirred at the same temperature for 12 h. After completion of the reaction (monitored by TLC), the reaction mixture was cooled to room temperature, filtered through a short silica gel bed (100-200 mesh), and concentrated under vacuum. The crude product was purified on a flash column chromatography using hexane/ethyl acetate (8:2) to afford the desired product **3a** in 284.4 mg, 69% yield.

### 3.0 Control experiments:

#### Deuterium incorporation studies

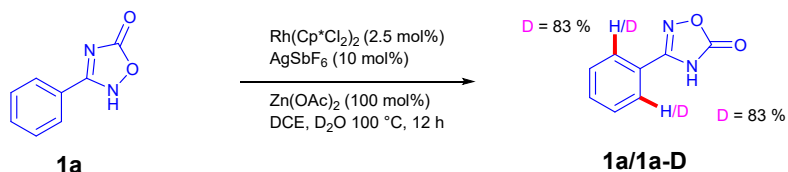

In a 10-mL screw cap reaction vial, 3-(*p*-tolyl)-1,2,4-oxadiazol-5(4H)-one **2a** (18.0 mg, 0.1 mmol), zinc acetate (18.3 mg, 0.1 mmol), [RhCp\*Cl<sub>2</sub>]<sub>2</sub> (1.23 mg, 2 mol%), AgsbF<sub>6</sub> (6.9 mg, 20 mol%), D<sub>2</sub>O (40.06 mg, 2.0 mmol), and 1.0 mL DCE were added. Then the reaction mixture was sealed with a screw cap after flushing with nitrogen and placed in oil bath at 100 °C. The reaction mixture was stirred at the same temperature for 12 h. After completion of the reaction (monitored by TLC), the reaction mixture was cooled to room temperature, filtered through a short silica gel bed (100-200 mesh), and concentrated under vacuum. The crude product was purified on a flash column chromatography using hexane/ethyl acetate (8:2) to afford the desired deuterio **1a-D** in 12.14 mg, 74% yield. The incorporation of deuterium was calculated from <sup>1</sup>H NMR spectrum.

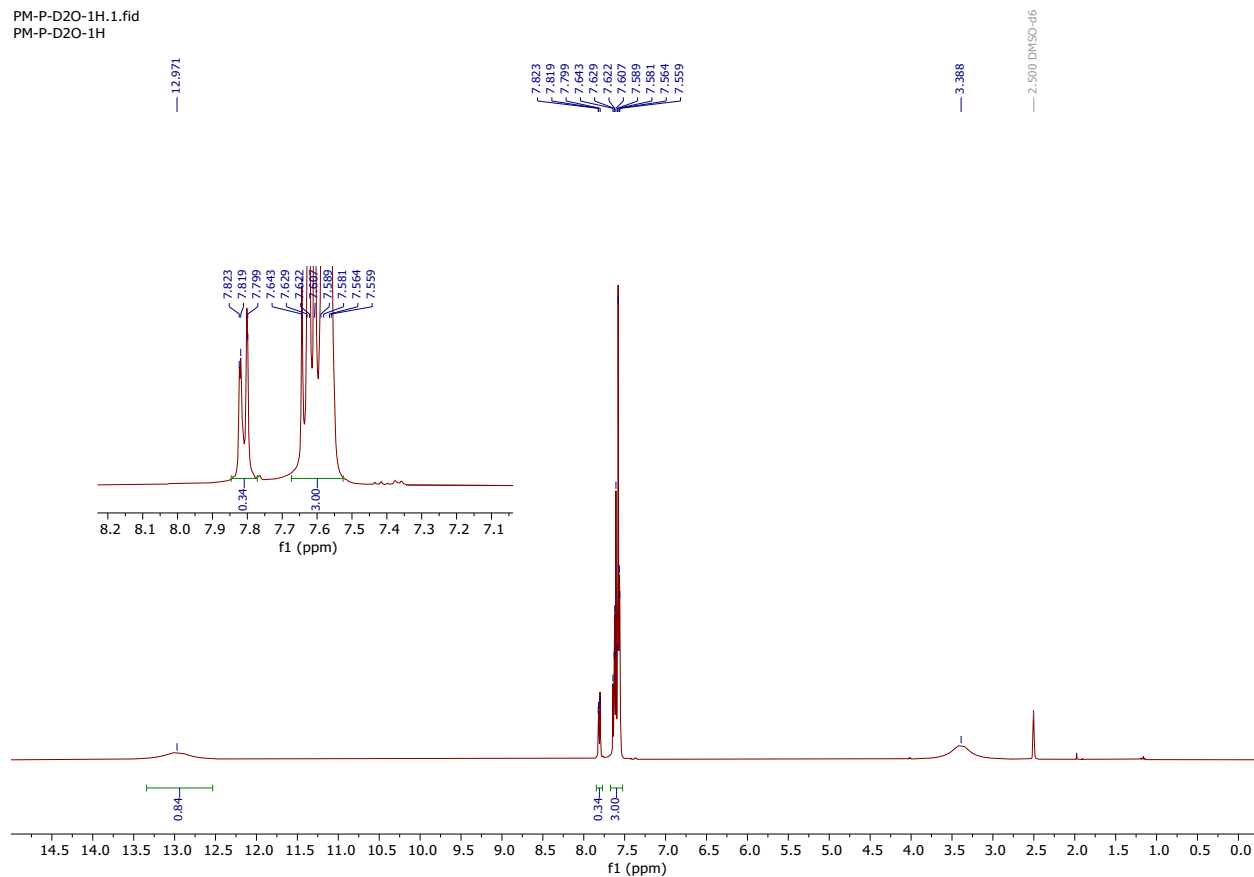

### 3.1 Competitive experiment between the oxadiazolone

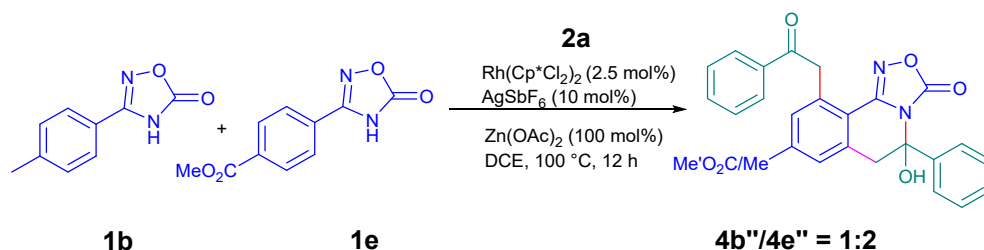

In a 10-mL screw cap reaction vial, 3-(p-tolyl)-1,2,4-oxadiazol-5(4H)-one **1b** (8.8 mg, 0.05 mmol), methyl 4-(5-oxo-4,5-dihydro-1,2,4-oxadiazol-3-yl)benzoate **1e** (11.0 mg, 0.05 mmol), phenyl sulfoxonium ylide **1a** (43.2 mg, 0.22 mmol), zinc acetate (18.3 mg, 0.1 mmol), [RhCp\*Cl<sub>2</sub>]<sub>2</sub> (1.23 mg, 2 mol%), Agsbf<sub>6</sub> (6.9 mg, 20 mol%), and 1.0 mL DCE were added. Then the reaction mixture was sealed with a screw cap after flushing with nitrogen and placed in oil bath at 100 °C. The reaction mixture was stirred at the same temperature for 12 h. After completion of the reaction (monitored by TLC), the reaction mixture was cooled to room temperature, filtered through a short silica gel bed (100-200 mesh), and concentrated under vacuum. The crude product was purified on a flash column chromatography using hexane/ethyl acetate (8:2) to afford the desired product **4b''/4e''** in 1:2 ratio

### 3.2 Competitive experiment between the sulfoxonium ylide

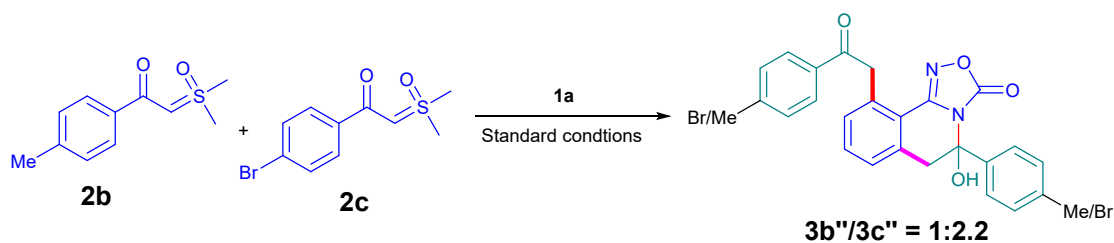

In a 10-mL screw cap reaction vial, 4-methyl-phenyl sulfoxonium ylide **2b** (46.26 mg, 2.2 mmol), 4-bromo-phenyl sulfoxonium ylide **2c** (60.53 mg, 2.2 mmol), 3-phenyl-1,2,4-oxadiazol-5(4H)-one **1a** (8.10 mg, 0.05 mmol), phenyl sulfoxonium ylide **1a** (43.2 mg, 0.22 mmol), zinc acetate (18.3 mg, 0.1 mmol), [RhCp\*Cl<sub>2</sub>]<sub>2</sub> (1.23 mg, 2 mol%), Agsbf<sub>6</sub> (6.9 mg, 20 mol%), and 1.0 mL DCE were added. Then the reaction mixture was sealed with a screw cap after flushing with nitrogen and placed in oil bath at 100 °C. The reaction mixture was stirred at the same temperature for 12 h. After completion of the reaction (monitored by TLC), the reaction mixture was cooled to room temperature, filtered through a short silica gel bed (100-200 mesh), and concentrated under vacuum. The crude product was purified on a flash column chromatography using hexane/ethyl acetate (8:2) to afford the desired product **3b''/3c''** in 1:2.2 ratio

#### 4.0 Characterization Data

##### 5-Hydroxy-8-methyl-10-(2-oxo-2-phenylethyl)-5-phenyl-5,6-dihydro-3H-[1,2,4]oxadiazolo[3,4-a]isoquinolin-3-one (3a)

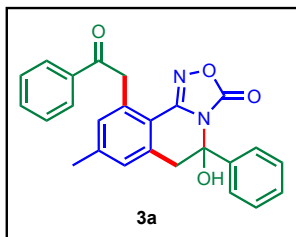

**Yield** (0.1 mmol scale, 30.10 mg, 73%); white solid; (hexane/ethyl acetate = 8:2, V/V). Melting point: 186-187 °C; **<sup>1</sup>H NMR** (400 MHz, CDCl<sub>3</sub>) δ 8.07 (d, *J* = 7.2 Hz, 2H), 7.61 (t, *J* = 7.2 Hz, 1H), 7.52 (t, *J* = 7.6 Hz, 2H), 7.39 – 7.29 (m, 5H), 7.03 (s, 1H), 6.92 (s, 1H), 5.14 (s, 1H), 4.93 (d, *J* = 17.6 Hz, 1H), 4.68 (d, *J* = 17.6 Hz, 1H), 3.71 (d, *J* = 16.0 Hz, 1H), 3.38 (d, *J* = 16.0 Hz, 1H), 2.31 (s, 3H); **<sup>13</sup>C NMR** (100 MHz, CDCl<sub>3</sub>) δ 197.0, 157.2, 154.6, 143.3, 140.3, 137.0, 135.0, 134.3, 133.3, 132.8, 129.3, 129.0, 129.0, 128.7, 128.3, 124.8, 116.8, 86.2, 45.5, 45.1, 21.5; **HR-MS** (ESI) *m/z* calcd for C<sub>25</sub>H<sub>21</sub>N<sub>2</sub>O<sub>4</sub><sup>+</sup> [M+H<sup>+</sup>] 413.1496, found 413.1496.

##### 5-Hydroxy-8-methyl-10-(2-oxo-2-(*p*-tolyl)ethyl)-5-(*p*-tolyl)-5,6-dihydro-3H-[1,2,4]oxadiazolo[3,4-a]isoquinolin-3-one (3b)

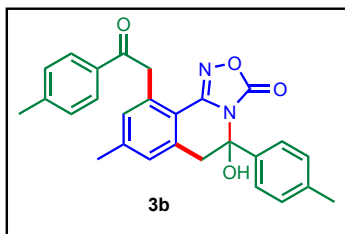

**Yield** (0.1 mmol scale, 33.92 mg, 77%); light brown solid; (hexane/ethyl acetate = 8:2, V/V). Melting point: 196-198 °C; **<sup>1</sup>H NMR** (400 MHz, CDCl<sub>3</sub>) δ 7.57 (d, *J* = 6.4 Hz, 2H), 7.07 (d, *J* = 8.2 Hz, 2H), 6.98 (s, 1H), 6.87 (d, *J* = 8.2 Hz, 2H), 6.84 – 6.74 (m, 1H), 4.83 (d, *J* = 17.0 Hz, 1H), 4.59 (d, *J* = 17.0 Hz, 1H), 3.69 (d, *J* = 16.0 Hz, 1H), 3.34 (d, *J* = 16.0 Hz, 1H), 2.36 (s, 3H). **<sup>13</sup>C NMR** (100 MHz, CDCl<sub>3</sub>) δ 196.9, 157.2, 154.6, 143.1, 140.3, 138.8, 137.0, 135.1, 134.3, 134.0, 132.7, 130.0, 128.9, 128.7, 125.4, 121.7, 116.8, 86.22, 45.49, 45.04, 21.52, 21.47, 21.44. δ 204.01, 177.82, 174.88, 159.85, 152.49, 138.43, 135.54, 129.27, 127.64, 125.99, 124.53, 124.31, 114.79, 55.67, 44.21, 41.59, 37.67, 29.95. **HR-MS** (ESI) *m/z* calcd for C<sub>27</sub>H<sub>25</sub>N<sub>2</sub>O<sub>4</sub><sup>+</sup> [M+H<sup>+</sup>] 441.1809, found 441.1800.

##### 5-(4-bromophenyl)-10-(2-(4-bromophenyl)-2-oxoethyl)-5-hydroxy-8-methyl-5,6-dihydro-3H-[1,2,4]oxadiazolo[3,4-a]isoquinolin-3-one (3c)

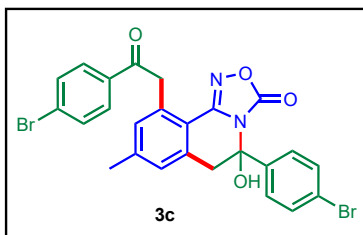

**Yield** (0.1 mmol scale, 35.97 mg, 66%); brown solid; (hexane/ethyl acetate = 8:2, V/V). Melting point: 186-197 °C; **<sup>1</sup>H NMR** (600 MHz, CDCl<sub>3</sub>) δ 7.91 (d, *J* = 8.4 Hz, 2H), 7.65 (d, *J* = 8.4 Hz, 2H), 7.48 (d, *J* = 8.8 Hz, 2H), 7.19 (d, *J* = 8.8 Hz, 2H), 7.03 (s, 1H), 6.93 (s, 1H), 5.19 (s, 1H), 4.90 (d, *J* = 17.6 Hz, 1H), 4.57 (d, *J* = 17.6 Hz, 1H), 3.67 (d, *J* = 16.0 Hz, 1H), 3.32 (d, *J* = 16.0 Hz, 1H), 2.33 (s, 3H). **<sup>13</sup>C NMR** (150 MHz, CDCl<sub>3</sub>) δ 196.0, 157.1, 154.4, 143.7, 139.4, 135.7, 134.8, 134.1, 133.0, 132.2, 132.1, 129.9, 129.8, 129.2, 128.6, 126.7, 123.7, 116.7, 85.9, 45.4, 45.0, 21.6. **HR-MS** (ESI) *m/z* calcd for C<sub>25</sub>H<sub>19</sub>Br<sub>2</sub>N<sub>2</sub>O<sub>4</sub><sup>+</sup> [M+H<sup>+</sup>] 571.9706, found 571.9701.



**5-(4-Fluorophenyl)-10-(2-(4-fluorophenyl)-2-oxoethyl)-5-hydroxy-8-methyl-5,6-dihydro-3H-[1,2,4]oxadiazolo[3,4-a]isoquinolin-3-one (3d)**

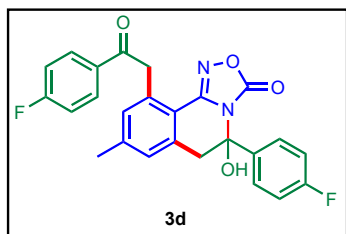

Yield (0.1 mmol scale, 29.60 mg, 66%); off white solid; (hexane/ethyl acetate = 8:2, V/V). Melting point: 229-231 °C; <sup>1</sup>H NMR (400 MHz, CDCl<sub>3</sub>) δ 8.09 (dd, *J* = 8.8, 5.2 Hz, 2H), 7.33 – 7.27 (m, 2H), 7.19 (t, *J* = 8.8 Hz, 2H), 7.08 – 7.00 (m, 3H), 6.93 (s, 1H), 5.14 (s, 1H), 4.93 (d, *J* = 17.6 Hz, 1H), 4.59 (d, *J* = 17.6 Hz, 1H), 3.71 (d, *J* = 16.0 Hz, 1H), 3.33 (d, *J* = 16.0 Hz, 1H), 2.34 (s, 3H). <sup>13</sup>C NMR (100 MHz, CDCl<sub>3</sub>) δ 195.4, 167.2(d, <sup>1</sup>*J*<sub>C-F</sub> = 253.1 Hz), 164.4(d, <sup>1</sup>*J*<sub>C-F</sub> = 247.4 Hz), 157.2, 154.5, 143.6, 136.3(d, <sup>4</sup>*J*<sub>C-F</sub> = 3.2 Hz), 134.5, 134.2, 133.5(d, <sup>4</sup>*J*<sub>C-F</sub> = 3.2 Hz), 132.9, 131.0(d, <sup>3</sup>*J*<sub>C-F</sub> = 9.3 Hz), 129.1, 126.9(d, <sup>3</sup>*J*<sub>C-F</sub> = 8.5 Hz), 116.8, 116.1(d, <sup>2</sup>*J*<sub>C-F</sub> = 21.7 Hz), 116.0(d, <sup>2</sup>*J*<sub>C-F</sub> = 21.7 Hz), 85.9, 45.4, 45.2, 21.6. <sup>19</sup>F NMR (376 MHz, CDCl<sub>3</sub>) δ -104.91, -112.36. HR-MS (ESI) *m/z* calcd for C<sub>25</sub>H<sub>19</sub>F<sub>2</sub>N<sub>2</sub>O<sub>4</sub><sup>+</sup> [M+H<sup>+</sup>] 449.1307, found 449.1302.

**5-(3-Bromophenyl)-10-(2-(3-bromophenyl)-2-oxoethyl)-5-hydroxy-8-methyl-5,6-dihydro-3H-[1,2,4]oxadiazolo[3,4-a]isoquinolin-3-one (3e)**

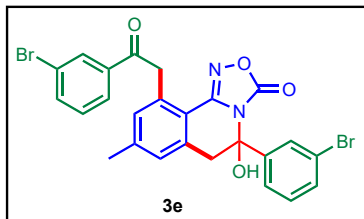

Yield (0.1 mmol scale, 31.36 mg, 55%); white solid; (hexane/ethyl acetate = 8:2, V/V). Melting point: 196-198 °C; <sup>1</sup>H NMR (600 MHz, Chloroform-*d*) <sup>1</sup>H NMR (600 MHz, CDCl<sub>3</sub>) δ 8.17 (s, 1H), 7.99 (d, *J* = 7.8 Hz, 1H), 7.74 (d, *J* = 7.2 Hz, 1H), 7.60 (s, 1H), 7.47 (d, *J* = 7.8 Hz, 1H), 7.40 (t, *J* = 7.8 Hz, 1H), 7.21 (t, *J* = 7.8 Hz, 1H), 7.13 (d, *J* = 8.4 Hz, 1H), 7.04 (s, 1H), 6.95 (s, 1H), 5.22 (s, 1H), 4.88 (d, *J* = 17.4 Hz, 1H), 4.61 (d, *J* = 17.4 Hz, 1H), 3.67 (d, *J* = 16.2 Hz, 1H), 3.35 (d, *J* = 16.2 Hz, 1H), 2.34 (s, 3H). <sup>13</sup>C NMR (150 MHz, CDCl<sub>3</sub>) δ 195.6, 157.0, 154.3, 143.7, 142.6, 138.7, 136.2, 134.6, 134.0, 133.0, 132.5, 131.3, 130.5, 130.4, 129.2, 128.3, 126.9, 123.5, 123.3, 123.1, 116.7, 85.4, 45.6, 45.1, 21.6. HR-MS (ESI) *m/z* calcd for C<sub>25</sub>H<sub>19</sub>Br<sub>2</sub>N<sub>2</sub>O<sub>4</sub><sup>+</sup> [M+H<sup>+</sup>] 571.9706, found 571.9711.

**5-Hydroxy-5-(3-methoxyphenyl)-10-(2-(3-methoxyphenyl)-2-oxoethyl)-8-methyl-5,6-dihydro-3H-[1,2,4]oxadiazolo[3,4-a]isoquinolin-3-one (3f)**

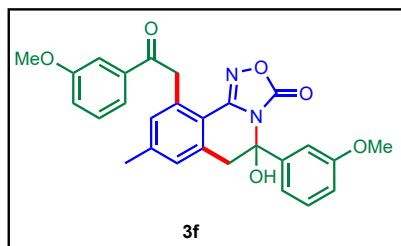

Yield (0.1 mmol scale, 37.32 mg, 79%); white solid; (hexane/ethyl acetate = 7.5:2.5, V/V). Melting point: 193-195 °C; <sup>1</sup>H NMR (600 MHz, Chloroform-*d*) <sup>1</sup>H NMR (400 MHz, CDCl<sub>3</sub>) δ 7.70 (d, *J* = 7.6 Hz, 1H), 7.59 (s, 1H), 7.46 (t, *J* = 8.0 Hz, 1H), 7.31 – 7.25 (m, 1H), 7.19 (dd, *J* = 7.6, 3.2 Hz, 1H), 7.06 (s, 1H), 6.96 (s, 1H), 6.93 – 6.84 (m, 3H), 5.16 (s, 1H), 4.93 (d, *J* = 17.5 Hz, 1H), 4.69 (d, *J* = 17.6 Hz, 1H), 3.91 (s, 3H), 3.81 (s, 3H), 3.73 (d, *J* = 15.9 Hz, 1H), 3.41 (d, *J* = 16.0 Hz, 1H), 2.35 (s, 3H). <sup>13</sup>C NMR (100 MHz,

CDCl<sub>3</sub>)  $\delta$  196.7, 160.0, 159.9, 157.2, 154.5, 143.3, 142.1, 138.4, 135.1, 134.3, 132.8, 130.1, 129.7, 129.0, 120.9, 119.6, 117.0, 116.8, 114.8, 112.7, 110.6, 86.09, 55.5, 55.4, 45.6, 45.0, 21.5.

**HR-MS** (ESI)  $m/z$  calcd for C<sub>27</sub>H<sub>25</sub>N<sub>2</sub>O<sub>6</sub><sup>+</sup> [M+H<sup>+</sup>] 473.1707, found 324. 473.1702.

**5-Hydroxy-8-methyl-10-(2-oxo-2-(3-(trifluoromethyl)phenyl)ethyl)-5-(3-(trifluoromethyl)phenyl)-5,6-dihydro-3H-[1,2,4]oxadiazolo[3,4-a]isoquinolin-3-one (3g)**

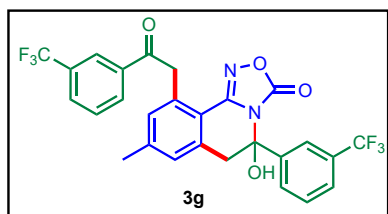

Yield (0.1 mmol scale, 27.97 mg, 51%); white solid; (hexane/ethyl acetate = 8:2, V/V). Melting point: 183-185 °C; **<sup>1</sup>H NMR** (400 MHz, CDCl<sub>3</sub>)  $\delta$  8.30 (s, 1H), 8.25 (d,  $J$  = 7.8 Hz, 1H), 7.88 (d,  $J$  = 7.8 Hz, 1H), 7.77 (s, 1H), 7.67 (t,  $J$  = 7.8 Hz, 1H), 7.61 (d,  $J$  = 7.8 Hz, 1H), 7.48 (t,  $J$  = 7.8 Hz, 1H), 7.38 (d,  $J$  = 7.8 Hz, 1H), 7.07 (s, 1H), 6.97 (s, 1H), 5.28 (s, 1H), 4.96 (d,  $J$  = 17.6

Hz, 1H), 4.65 (d,  $J$  = 17.6 Hz, 1H), 3.69 (d,  $J$  = 16.0 Hz, 1H), 3.38 (d,  $J$  = 16.0 Hz, 1H), 2.35 (s, 3H). **<sup>13</sup>C NMR** (100 MHz, CDCl<sub>3</sub>)  $\delta$  195.6, 156.8, 154.2, 143.7, 141.3, 137.4, 134.3, 133.8, 133.0, 132.0(q,  $J_{C-F}$  = 32.5 Hz), 131.4, 130.8(q,  $J_{C-F}$  = 32.5 Hz), 129.8(q,  $J_{C-F}$  = 3.7 Hz), 129.4, 129.2, 128.1, 127.8(q,  $J_{C-F}$  = 270.7 Hz), 126.2(q,  $J_{C-F}$  = 3.6 Hz), 125.0(q,  $J_{C-F}$  = 3.6 Hz), 121.1(q,  $J_{C-F}$  = 3.6 Hz), 116.5, 85.4, 45.5, 45.1, 21.4. **HR-MS** (ESI)  $m/z$  calcd for C<sub>27</sub>H<sub>19</sub>F<sub>6</sub>N<sub>2</sub>O<sub>4</sub><sup>+</sup> [M+H<sup>+</sup>] 549.1244, found 549.1238.

**5-(2-Chlorophenyl)-10-(2-(2-chlorophenyl)-2-oxoethyl)-5-hydroxy-8-methyl-5,6-dihydro-3H-[1,2,4]oxadiazolo[3,4-a]isoquinolin-3-one (3h)**

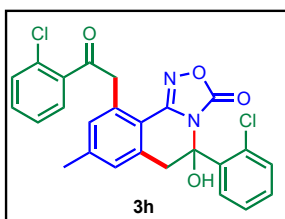

Yield (0.1 mmol scale, 30.80 mg, 64%); light brown solid; (hexane/ethyl acetate = 8:2 V/V). Melting point: 161-163 °C; **<sup>1</sup>H NMR** (600 MHz, Chloroform-*d*) <sup>1</sup>H NMR (400 MHz, CDCl<sub>3</sub>)  $\delta$  8.03 (t,  $J$  = 1.9 Hz, 1H), 7.95 (dt,  $J$  = 7.6, 1.2 Hz, 1H), 7.59 (ddd,  $J$  = 8.0, 2.4, 1.2 Hz, 1H), 7.47 (t,  $J$  = 7.6 Hz, 1H), 7.43 (t,  $J$  = 2.0 Hz, 1H), 7.35 – 7.25 (m, 2H), 7.10 (dt,  $J$  = 7.6, 1.6 Hz, 1H), 7.05 (s, 1H), 6.95 (s, 1H), 5.18 (s, 1H), 4.89 (d,  $J$  =

17.6 Hz, 1H), 4.62 (d,  $J$  = 17.6 Hz, 1H), 3.69 (d,  $J$  = 16.0 Hz, 1H), 3.36 (d,  $J$  = 16.0 Hz, 1H), 2.35 (s, 3H). **<sup>13</sup>C NMR** (100 MHz, CDCl<sub>3</sub>)  $\delta$  195.7, 157.0, 154.4, 143.7, 142.4, 138.5, 135.2, 135.1, 134.6, 134.0, 133.3, 133.0, 130.3, 130.1, 129.6, 129.2, 128.4, 126.4, 125.4, 123.0, 116.7, 85.6, 21.6. **HR-MS** (ESI)  $m/z$  calcd for C<sub>25</sub>H<sub>19</sub>Cl<sub>2</sub>N<sub>2</sub>O<sub>4</sub><sup>+</sup> [M+H<sup>+</sup>] 481.0716, found 481.0700.

**5-(3,5-Dimethylphenyl)-10-(2-(3,5-dimethylphenyl)-2-oxoethyl)-5-hydroxy-8-methyl-5,6-dihydro-3H-[1,2,4]oxadiazolo[3,4-a]isoquinolin-3-one (3i)**

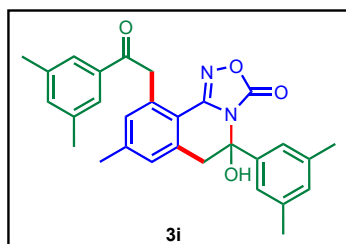

Yield (0.1 mmol scale, 36.54 mg, 81%); white solid; (hexane/ethyl acetate = 8:2, V/V). Melting point: 186-188 °C; **<sup>1</sup>H NMR** (400 MHz, CDCl<sub>3</sub>)  $\delta$  7.68 (s, 2H), 7.00 (s, 1H), 6.96 (s, 1H), 6.91 (s, 3H), 5.02 (s, 1H), 4.98 (d,  $J$  = 17.6 Hz, 1H), 4.59 (d,  $J$  = 17.6 Hz, 1H), 3.69 (d,  $J$  = 16.0 Hz, 1H), 3.37 (d,  $J$  = 16.0 Hz, 1H), 2.42 (s, 6H), 2.32 (s, 4H), 2.30 (s, 6H). **<sup>13</sup>C NMR** (100 MHz, CDCl<sub>3</sub>)  $\delta$  197.0, 157.4,

154.8, 143.1, 140.3, 138.6, 138.3, 137.2, 135.31, 134.9, 134.4, 132.7, 131.0, 128.9, 126.0, 122.6, 116.9, 86.3, 45.6, 45.0, 21.5, 21.4. **HR-MS** (ESI)  $m/z$  calcd for  $C_{29}H_{29}N_2O_4^+$   $[M+H]^+$  469.2122, found 469.2122.

**5-Hydroxy-8-methyl-10-(2-oxo-2-(thiophen-2-yl)ethyl)-5-(thiophen-2-yl)-5,6-dihydro-3H-[1,2,4]oxadiazolo[3,4-a]isoquinolin-3-one (3j)**

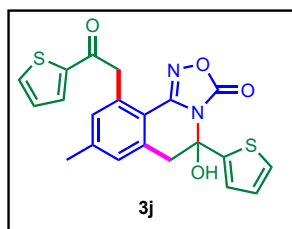

**Yield** (0.1 mmol scale, 27.16 mg, 64%); white solid; (hexane/ethyl acetate = 8:2, V/V). Melting point: 180-182 °C;  **$^1H$  NMR** (400 MHz,  $CDCl_3$ )  $\delta$  7.57 (d,  $J$  = 6.4 Hz, 2H), 7.07 (d,  $J$  = 8.2 Hz, 2H), 6.98 (s, 1H), 6.87 (d,  $J$  = 8.2 Hz, 2H), 6.84 – 6.74 (m, 1H), 4.83 (d,  $J$  = 17.0 Hz, 1H), 4.59 (d,  $J$  = 17.0 Hz, 1H), 3.69 (d,  $J$  = 16.0 Hz, 1H), 3.34 (d,  $J$  = 16.0 Hz, 1H), 2.36 (s, 3H).  **$^{13}C$  NMR** (100 MHz,  $CDCl_3$ )  $\delta$  195.4, 156.9, 154.2, 143.6, 142.5, 138.6, 136.1, 134.5, 133.9, 132.5, 131.2, 130.4, 129.1, 126.7, 123.4, 123.2, 116.6, 85.4, 45.5, 44.9, 21.5. **HR-MS** (ESI)  $m/z$  calcd for  $C_{21}H_{17}N_2O_4S_2^+$   $[M+H]^+$  425.0624, found 425.0616.

**5-Hydroxy-8-methyl-5-(naphthalen-2-yl)-10-(2-(naphthalen-2-yl)-2-oxoethyl)-5,6-dihydro-3H-[1,2,4]oxadiazolo[3,4-a]isoquinolin-3-one (3k)**

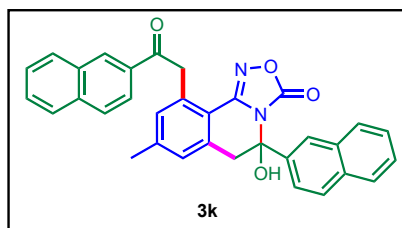

**Yield** (0.1 mmol scale, 39.98 mg, 78%); off white solid; (hexane/ethyl acetate = 8:2, V/V). Melting point: 198-200 °C;  **$^1H$  NMR** (400 MHz,  $CDCl_3$ )  $\delta$  8.67 (s, 1H), 8.15 (dd,  $J$  = 8.2, 1.6 Hz, 1H), 8.04 (d,  $J$  = 7.2 Hz, 1H), 7.97 (d,  $J$  = 8.2 Hz, 1H), 7.92 (t,  $J$  = 7.2 Hz, 3H), 7.86 (d,  $J$  = 8.8 Hz, 1H), 7.84 – 7.78 (m, 1H), 7.71 (d,  $J$  = 2.4 Hz, 1H), 7.67 – 7.56 (m, 3H), 7.54 – 7.47 (m, 3H), 7.07 (s, 1H), 6.90 (s, 1H), 5.25 (s, 1H), 5.18 (d,  $J$  = 17.6 Hz, 1H), 4.78 (d,  $J$  = 17.6 Hz, 1H), 3.80 (d,  $J$  = 16.0 Hz, 1H), 3.47 (d,  $J$  = 16.0 Hz, 1H), 2.29 (s, 3H).  **$^{13}C$  NMR** (100 MHz,  $CDCl_3$ )  $\delta$  196.8, 157.4, 154.9, 143.4, 137.4, 135.9, 135.2, 134.5, 134.4, 133.5, 132.9, 132.9, 132.7, 130.0, 129.8, 129.3, 129.1, 128.9, 128.6, 128.6, 127.9, 127.6, 127.0, 126.9, 126.8, 124.4, 124.1, 122.4, 117.1, 86.6, 45.6, 45.1, 21.5. **HR-MS** (ESI)  $m/z$  calcd for  $C_{33}H_{25}N_2O_4^+$   $[M+H]^+$  513.1809, found 513.1801.

**5-(2-Fluorophenyl)-10-(2-(2-fluorophenyl)-2-oxoethyl)-5-hydroxy-5,6-dihydro-3H-[1,2,4]oxadiazolo[3,4-a]isoquinolin-3-one (3m)**

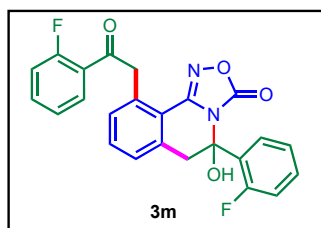

**Yield** (0.1 mmol scale, 32.15 mg, 74%); off white solid; (hexane/ethyl acetate = 8:2, V/V). Melting point: 182-184 °C;  **$^1H$  NMR** (400 MHz,  $CDCl_3$ )  $\delta$  7.96 (d,  $J$  = 7. Hz, 1H), 7.88 – 7.76 (m, 2H), 7.63 – 7.53 (m, 2H), 7.46 – 7.38 (m, 2H), 7.35 (d,  $J$  = 3.2 Hz, 1H), 7.25 – 7.20 (m, 1H), 7.17 (d,  $J$  = 7.2 Hz, 1H), 7.12 (td,  $J$  = 8.4, 2.4 Hz, 1H), 5.45 (s, 1H), 5.03 (d,  $J$  = 17.6 Hz, 1H), 4.79 (d,  $J$  = 17.6 Hz, 1H), 3.79 (d,  $J$  = 16.0 Hz, 1H), 3.52 (d,  $J$  = 16.0 Hz, 1H).  **$^{13}C$  NMR** (100 MHz,  $CDCl_3$ )  $\delta$  195.8, 164.27 (d,  $^1J_{C-F}$  = 246.4

Hz), 164.22 (d,  $^1J_{C-F}$  = 246.4 Hz), 157.0, 154.3, 142.7 (d,  $^3J_{C-F}$  = 6.6 Hz), 138.9 (d,  $^3J_{C-F}$  = 6.4 Hz), 134.8, 134.2, 132.8, 132.1, 130.7 (d,  $^3J_{C-F}$  = 7.9 Hz), 130.5 (d,  $^3J_{C-F}$  = 7.9 Hz), 129.5, 126.1, 124.1 (d,  $^4J_{C-F}$  = 2.9 Hz), 120.64, 120.4, 119.4, 116.6 (d,  $^2J_{C-F}$  = 21.0 Hz), 115.2 (d,  $^1J_{C-F}$  = 22.2 Hz), 112.7 (d,  $^2J_{C-F}$  = 23.6 Hz), 85.6, 45.8, 45.2. **HR-MS** (ESI)  $m/z$  calcd for  $C_{24}H_{17}F_2N_2O_4^+$   $[M+H^+]$  435.1151, found 435.1144.

**5-([1,1'-biphenyl]-4-yl)-10-(2-([1,1'-biphenyl]-4-yl)-2-oxoethyl)-5-hydroxy-5,6-dihydro-3H-[1,2,4]oxadiazolo[3,4-a]isoquinolin-3-one (3n)**

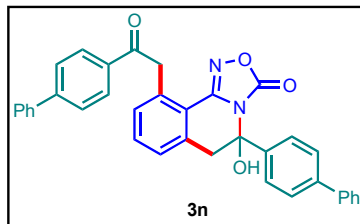

**Yield** (0.1 mmol scale, 45.70 mg, 83%); off white solid; (hexane/ethyl acetate = 8:2, V/V). Melting point: 198-200 °C;  $^1H$  NMR (400 MHz,  $CDCl_3$ )  $\delta$  8.16 (d,  $J$  = 8.2 Hz, 2H), 7.75 (d,  $J$  = 8.4 Hz, 2H), 7.68 (d,  $J$  = 7.2 Hz, 3H), 7.57 (d,  $J$  = 8.4 Hz, 2H), 7.51 – 7.46 (m, 5H), 7.46 – 7.40 (m, 5H), 7.35 (d,  $J$  = 7.2 Hz, 1H), 7.17 (d,  $J$  = 7.2 Hz, 1H), 5.05 (d,  $J$  = 17.6 Hz, 1H), 4.76 (d,  $J$  = 17.6 Hz, 1H), 4.48 (s, 1H), 3.75 (d,  $J$  = 16.0 Hz, 1H), 3.49 (d,  $J$  = 16.0 Hz, 1H).  $^{13}C$  NMR (125 MHz,  $CDCl_3$ )  $\delta$  196.7, 161.7, 157.3, 157.1, 154.6, 146.1, 142.2, 140.0, 138.9, 135.7, 135.3, 134.5, 132.6, 132.6, 132.0, 129.4, 129.0, 128.9, 127.8, 127.7, 127.4, 127.1, 126.1, 125.4, 122.6, 119.6, 86.2, 45.8, 45.4. **HR-MS** (ESI)  $m/z$  calcd for  $C_{36}H_{27}N_2O_4^+$   $[M+H^+]$  551.1965, found 551.1975.

**5-(4-Chlorophenyl)-10-(2-(4-chlorophenyl)-2-oxoethyl)-5-hydroxy-5,6-dihydro-3H-[1,2,4]oxadiazolo[3,4-a]isoquinolin-3-one (4a)**

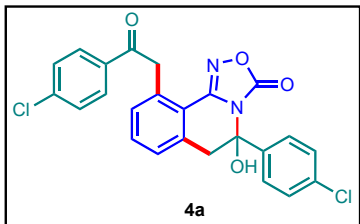

**Yield** (0.1 mmol scale, 34.11 mg, 79%); off white solid; (hexane/ethyl acetate = 8:2, V/V). Melting point: 191-193 °C;  $^1H$  NMR (400 MHz,  $CDCl_3$ )  $\delta$  8.00 (d,  $J$  = 8.8 Hz, 2H), 7.50 (d,  $J$  = 8.8 Hz, 2H), 7.47 – 7.42 (m, 2H), 7.33 (d,  $J$  = 8.8 Hz, 2H), 7.30 – 7.22 (m, 4H), 7.14 (d,  $J$  = 7.5 Hz, 1H), 5.12 (s, 1H), 4.96 (d,  $J$  = 17.6 Hz, 1H), 4.64 (d,  $J$  = 17.6 Hz, 1H), 3.72 (d,  $J$  = 16.0 Hz, 1H), 3.39 (d,  $J$  = 16.0 Hz, 1H).  $^{13}C$  NMR (100 MHz,  $CDCl_3$ )  $\delta$  195.6, 157.0, 154.4, 139.9, 138.7, 135.5, 135.3, 135.0, 134.2, 132.7, 132.1, 131.6, 129.7, 129.3, 129.1, 129.0, 128.5, 126.4, 119.6, 85.8, 45.6, 45.2. **HR-MS** (ESI)  $m/z$  calcd for  $C_{24}H_{17}Cl_2N_2O_4^+$   $[M+H^+]$  467.0560, found 467.0566.

**8-Chloro-5-(4-chlorophenyl)-10-(2-(4-chlorophenyl)-2-oxoethyl)-5-hydroxy-5,6-dihydro-3H-[1,2,4]oxadiazolo[3,4-a]isoquinolin-3-one (4b)**

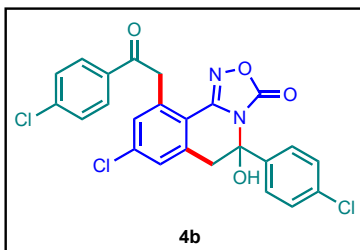

**Yield** (0.1 mmol scale, 33.11 mg, 66%); white solid; (hexane/ethyl acetate = 8:2, V/V). Melting point: 189-190 °C;  $^1H$  NMR (400 MHz,  $CDCl_3$ )  $\delta$  8.00 (d,  $J$  = 8.8 Hz, 2H), 7.52 (d,  $J$  = 8.8 Hz, 2H), 7.37 (d,  $J$  = 8.8 Hz, 2H), 7.27 (d,  $J$  = 8.8 Hz, 4H), 7.17 (s, 1H), 5.22 (s, 1H), 4.96 (d,  $J$  = 17.6 Hz, 1H), 4.61 (d,  $J$  = 17.6 Hz, 1H), 3.71 (d,  $J$  = 16.0 Hz, 1H), 3.37 (d,  $J$  = 16.0 Hz, 1H).  $^{13}C$  NMR (100 MHz,  $CDCl_3$ )  $\delta$  195.0, 156.8, 153.9, 140.1, 138.8, 138.4, 136.8,

135.8, 135.7, 135.0, 132.2, 131.6, 129.7, 129.4, 129.2, 129.0, 128.5, 126.4, 118.2, 85.7, 45.4, 45.1. **HR-MS** (ESI)  $m/z$  calcd for  $C_{24}H_{17}Cl_3N_2O_4^+$   $[M+H]^+$  501.0170, found 501.0162.

**8-bromo-5-hydroxy-10-(2-oxo-2-(*m*-tolyl)ethyl)-5-(*m*-tolyl)-5,6-dihydro-3H-[1,2,4]oxadiazolo[3,4-*a*]isoquinolin-3-one (4c)**

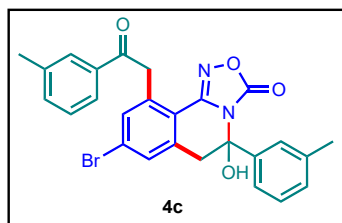

Yield (0.1 mmol scale, 34.37 mg, 68%); white solid; (hexane/ethyl acetate = 8:2, V/V). Melting point: 170-172 °C; 400 MHz,  $CDCl_3$   $\delta$  7.84 (s, 2H), 7.41 (d,  $J = 8.8$  Hz, 2H), 7.27 – 7.23 (m, 1H), 7.21 (d,  $J = 2.4$  Hz, 1H), 7.15 (d,  $J = 7.4$  Hz, 1H), 7.11 (s, 2H), 7.06 (d,  $J = 8.8$  Hz, 1H), 5.03 (s, 1H), 4.98 (d,  $J = 17.6$  Hz, 1H), 4.63 (d,  $J = 17.6$  Hz, 1H), 3.71 (d,  $J = 16.0$  Hz, 1H), 3.38 (d,  $J = 16.1$  Hz, 1H), 2.45 (s, 3H), 2.35 (s, 3H).  $^{13}C$  NMR (100 MHz,  $CDCl_3$ )  $\delta$  196.1, 157.0, 154.1, 139.9, 139.1, 138.6, 138.4, 137.2, 136.8, 136.1, 134.3, 132.0, 130.4, 129.0, 128.8, 128.7, 128.3, 125.5, 125.4, 121.8, 118.4, 86.2, 45.5, 45.0, 21.6, 21.5. **HR-MS** (ESI)  $m/z$  calcd for  $C_{26}H_{22}BrN_2O_4^+$   $[M+H]^+$  505.0757, found 505.0748.

**Methyl 5-(4-fluorophenyl)-10-(2-(3-fluorophenyl)-2-oxoethyl)-5-hydroxy-3-oxo-5,6-dihydro-3H-[1,2,4]oxadiazolo[3,4-*a*]isoquinoline-8-carboxylate (4d)**

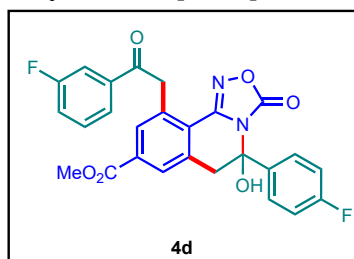

Yield (0.1 mmol scale, 35.46 mg, 72%); brown solid; (hexane/ethyl acetate = 8:2, V/V). Melting point: 171-172 °C;  $^1H$  NMR (400 MHz,  $CDCl_3$ )  $\delta$  8.08 (dd,  $J = 8.8, 5.2$  Hz, 2H), 7.90 (s, 1H), 7.79 (s, 1H), 7.31 (dd,  $J = 8.8, 4.8$  Hz, 2H), 7.20 (t,  $J = 8.6$  Hz, 2H), 7.05 (t,  $J = 8.6$  Hz, 2H), 5.22 (s, 1H), 5.04 (d,  $J = 17.6$  Hz, 1H), 4.70 (d,  $J = 17.6$  Hz, 1H), 3.90 (s, 3H), 3.76 (d,  $J = 16.0$  Hz, 1H), 3.47 (d,  $J = 16.0$  Hz, 1H).  $^{13}C$  NMR (100 MHz,  $CDCl_3$ )  $\delta$  194.7, 167.3 (d,  $^1J_{C-F} = 253.6$  Hz), 165.5, 164.5 (d,  $^1J_{C-F} = 247.8$  Hz), 156.8, 154.0, 135.7 (d,  $^4J_{C-F} = 3.2$  Hz), 135.5, 134.6, 133.5, 133.2 (d,  $^4J_{C-F} = 2.9$  Hz), 132.8, 131.0 (d,  $^3J_{C-F} = 9.3$  Hz), 129.3, 127.0 (d,  $^3J_{C-F} = 8.4$  Hz), 123.5, 116.3 (d,  $^2J_{C-F} = 21.6$  Hz), 116.0 (d,  $^2J_{C-F} = 21.9$  Hz), 86.0, 52.8, 45.5, 45.3.  $^{19}F$  NMR (376 MHz,  $CDCl_3$ )  $\delta$  -104.40, -111.93. **HR-MS** (ESI)  $m/z$  calcd for  $C_{26}H_{19}F_2NO_6^+$   $[M+H]^+$  493.1206, found 493.1200.

**3-(2-(2-(4-Chlorophenyl)-2-oxoethyl)-3-(trifluoromethyl)phenyl)-1,2,4-oxadiazol-5(4H)-one (4e+4e')**

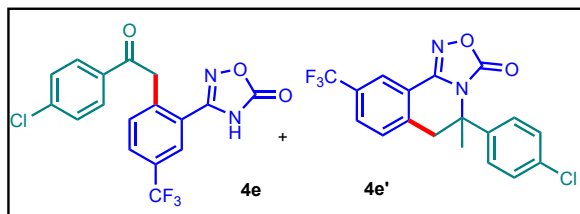

Yield (0.1 mmol scale, 27.56 mg, 72%); Yellow solid; (hexane/ethyl acetate = 8:2, V/V).  $^1H$  NMR (400 MHz,  $DMSO-d_6$ )  $\delta$  12.11 (s, 1H), 7.23 (s, 1H), 7.17 (d,  $J = 8.8$  Hz, 2H), 7.11 (d,  $J = 8.8$  Hz, 1H), 6.85 (dd,  $J = 8.2, 3.6$  Hz, 1H), 6.77 (d,  $J = 8.4$  Hz, 2H), 4.02 (s, 2H).  $^{13}C$  NMR (100 MHz,  $DMSO-d_6$ )  $\delta$  195.3, 159.3, 156.8, 139.6, 138.3, 135.0, 131.1 (q,  $J_{C-F} = 270$  Hz), 129.9, 128.9, 128.7,

128.1, 128.0, 127.9(q,  $J_{C-F}$  = 3.6 Hz), 127.5(q,  $J_{C-F}$  = 3.8 Hz), 125.70, 125.14, 44.2.  $^{19}\text{F}$  NMR (376 MHz, DMSO- $d_6$ )  $\delta$  -61.16. **HR-MS** (ESI)  $m/z$  calcd for  $\text{C}_{17}\text{H}_{11}\text{ClF}_3\text{N}_2\text{O}_3^+$  [ $\text{M}+\text{H}^+$ ] 383.0405 found 383.0400.

### 5-(4-Chlorophenyl)-5-hydroxy-10-methyl-5,6-dihydro-3H-[1,2,4]oxadiazolo[3,4-a]isoquinolin-3-one (4g)

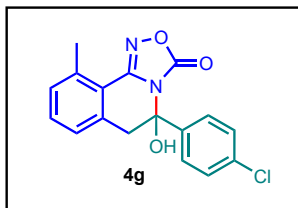

Yield (0.1 mmol scale, 25.26 mg, 77%); white solid; (hexane/ethyl acetate = 8:2, V/V). Melting point: 178-180 °C;  $^1\text{H}$  NMR (400 MHz,  $\text{CDCl}_3$ )  $\delta$  7.33 (d,  $J$  = 7.6 Hz, 1H), 7.30 (d,  $J$  = 8.8 Hz, 2H), 7.26 (d,  $J$  = 8.4 Hz, 1H), 7.19 (d,  $J$  = 8.8 Hz, 2H), 7.01 (d,  $J$  = 7.6 Hz, 1H), 5.18 (s, 1H), 3.70 (d,  $J$  = 16.0 Hz, 1H), 3.37 (d,  $J$  = 16.0 Hz, 1H), 2.70 (s, 3H).

$^{13}\text{C}$  NMR (100 MHz,  $\text{CDCl}_3$ )  $\delta$  157.5, 154.8, 139.4, 139.1, 135.5, 133.7, 132.5, 131.3, 129.3, 126.9, 126.2, 118.5, 85.7, 45.0, 22.9. **HR-MS** (ESI)  $m/z$  calcd for  $\text{C}_{17}\text{H}_{14}\text{ClN}_2\text{O}_3^+$  [ $\text{M}+\text{H}^+$ ] 329.0687, found 329.0681.

### 3-(2-Bromo-6-(2-oxo-2-(p-tolyl)ethyl)phenyl)-1,2,4-oxadiazol-5(4H)-one (4i+4i')

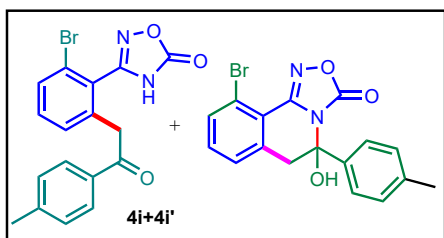

Yield (0.1 mmol scale, 24.63 mg, 66%); white solid; (hexane/ethyl acetate = 8:2, V/V). Melting point: 175-176 °C;  $^1\text{H}$  NMR (400 MHz,  $\text{CDCl}_3$ )  $\delta$  7.75 (s, 1H), 7.63 (d,  $J$  = 8.2 Hz, 1H), 7.44 (d,  $J$  = 7.6 Hz, 1H), 7.40 – 7.35 (m, 2H), 7.24 (d,  $J$  = 7.6 Hz, 1H), 7.15 – 7.11 (m, 1H), 4.47 (s, 2H), 2.42 (s, 3H).  $^{13}\text{C}$  NMR (125 MHz,  $\text{CDCl}_3$ )  $\delta$  197.6, 158.8, 156.0, 139.0, 137.8, 135.8, 135.2, 133.0, 132.4, 130.3, 129.1, 128.9,

125.8, 43.6, 21.4. **HR-MS** (ESI)  $m/z$  calcd for  $\text{C}_{17}\text{H}_{14}\text{BrN}_2\text{O}_3^+$  [ $\text{M}+\text{H}^+$ ] 374.0182, found 374.0190.

PM-31A-1H.1.fid  
PM-31A-1H

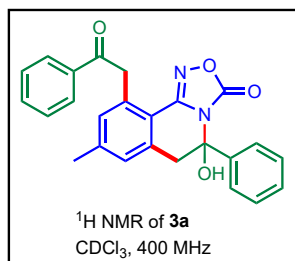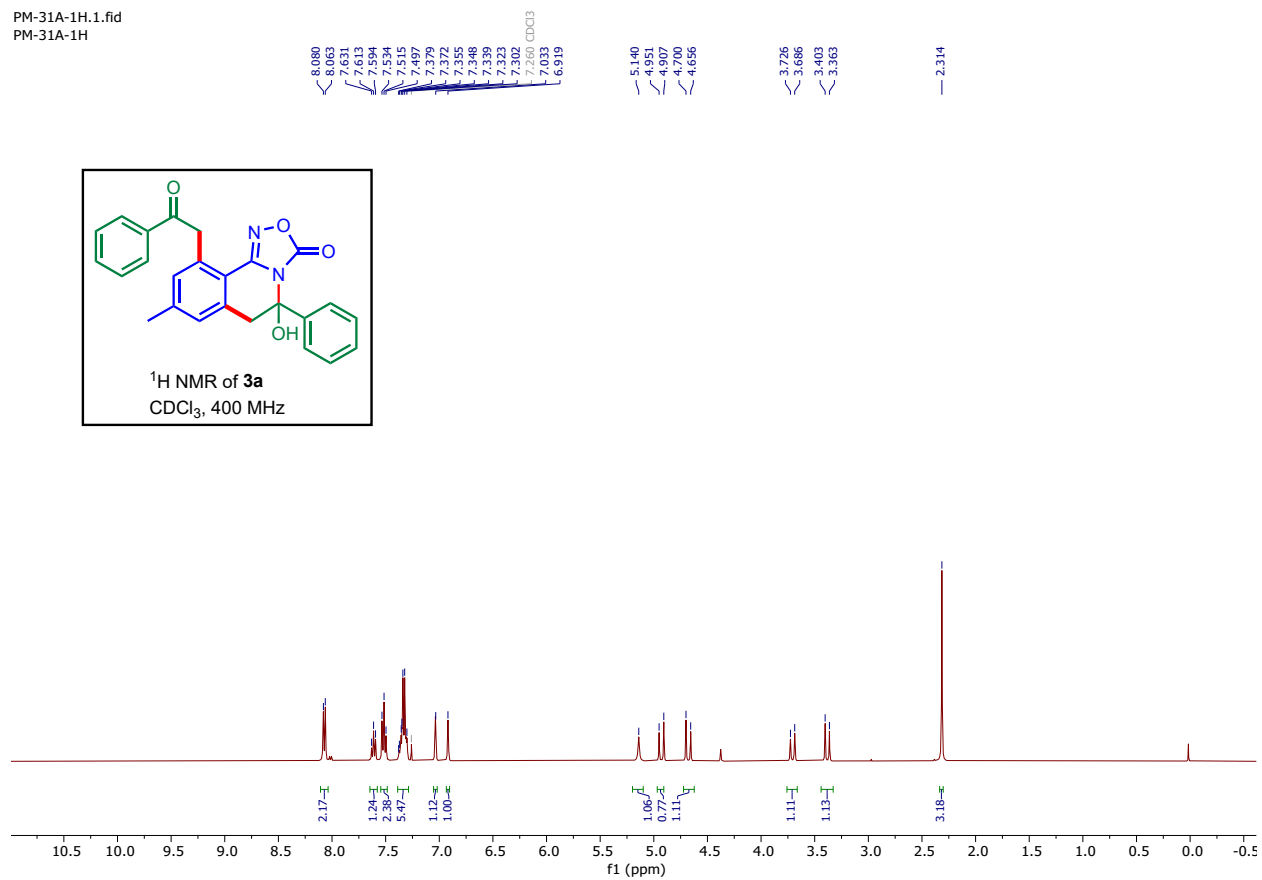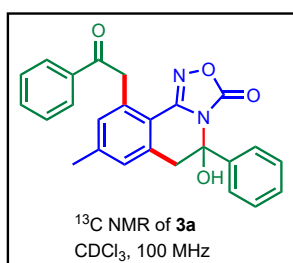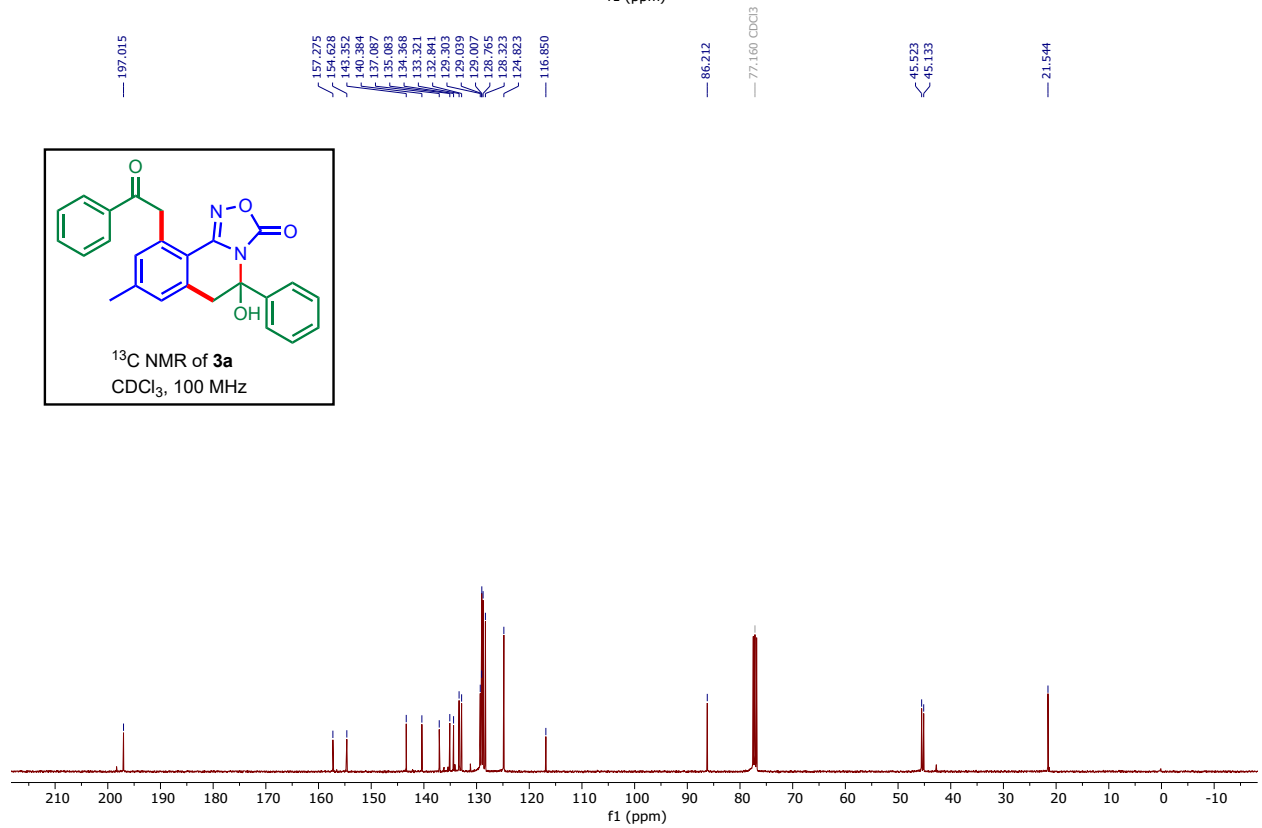

1 (4)/1

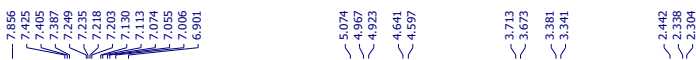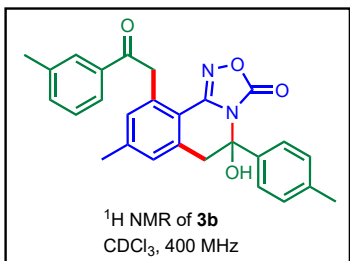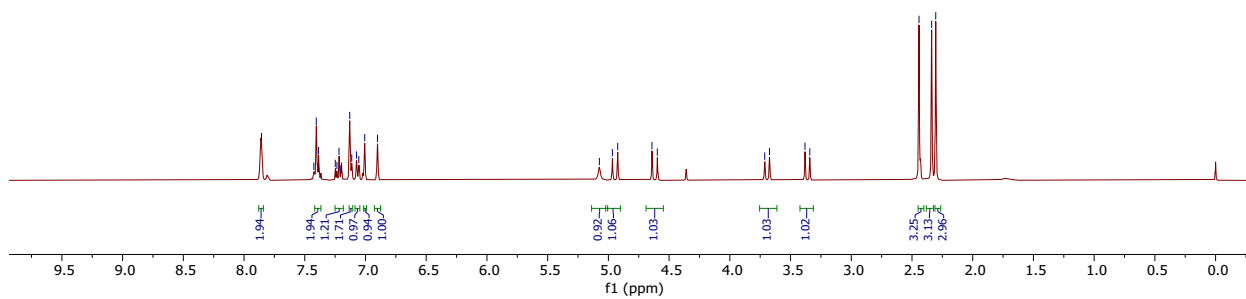

10 (3).20.fid

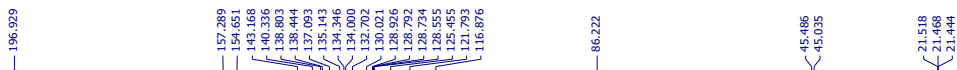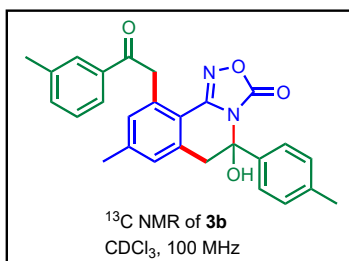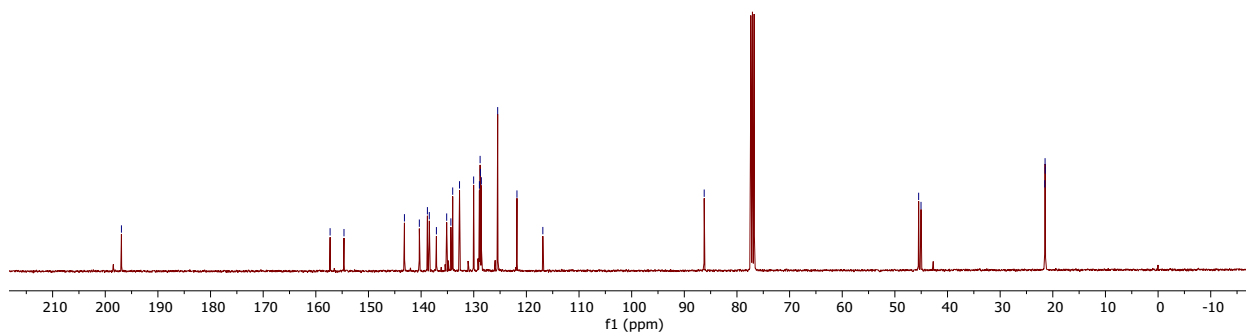



K4PTC-1.1.fid

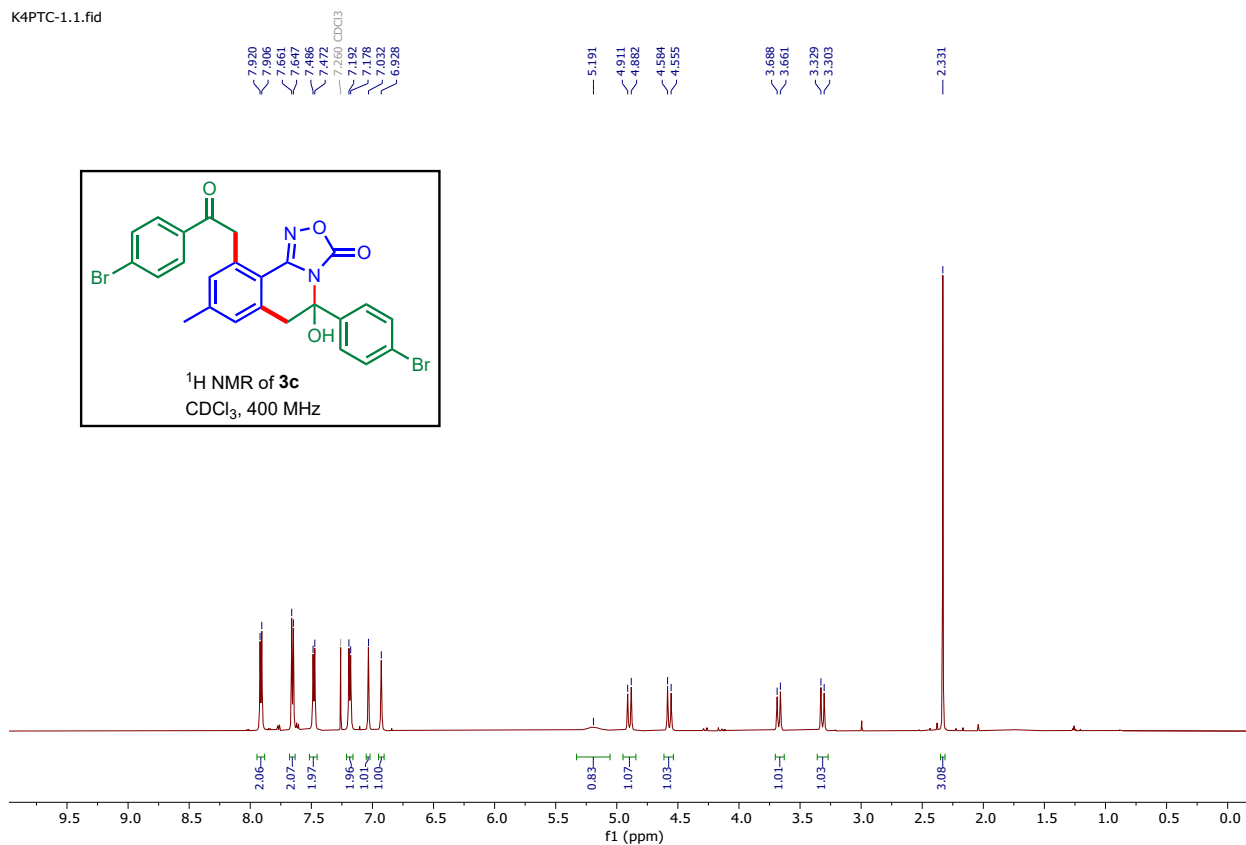

K4PTC-1.2.fid

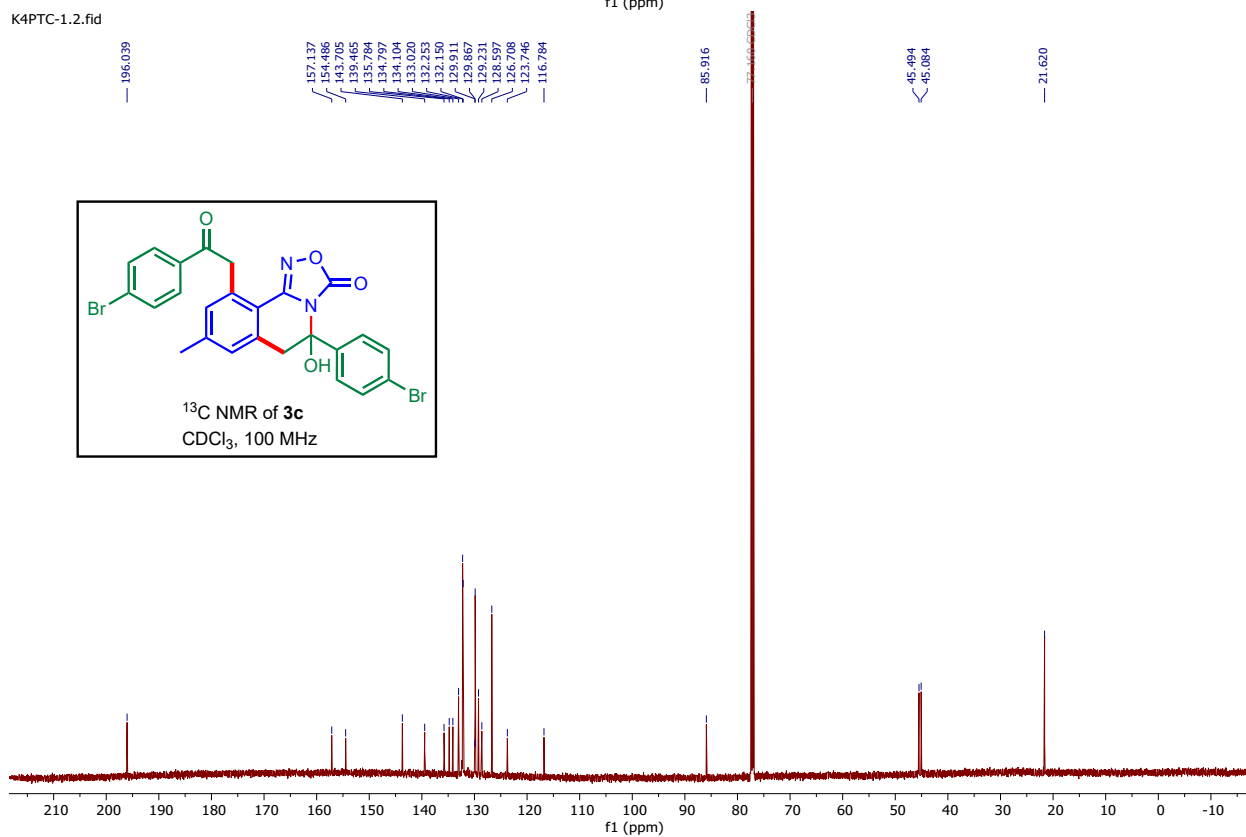

PM-33-A-1H.1.fid  
PM-33-A-1H

8.107  
8.093  
8.084  
8.071  
7.317  
7.311  
7.299  
7.294  
7.287  
7.280  
7.270 CDCl<sub>3</sub>  
7.188  
7.167  
7.058  
7.037  
7.015  
6.933

5.136  
4.948  
4.905  
4.616  
4.572

3.727  
3.688  
3.353  
3.313

1.642

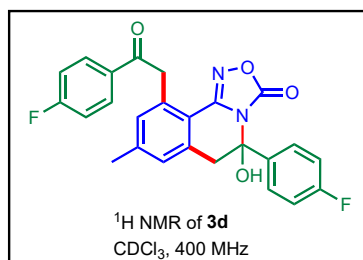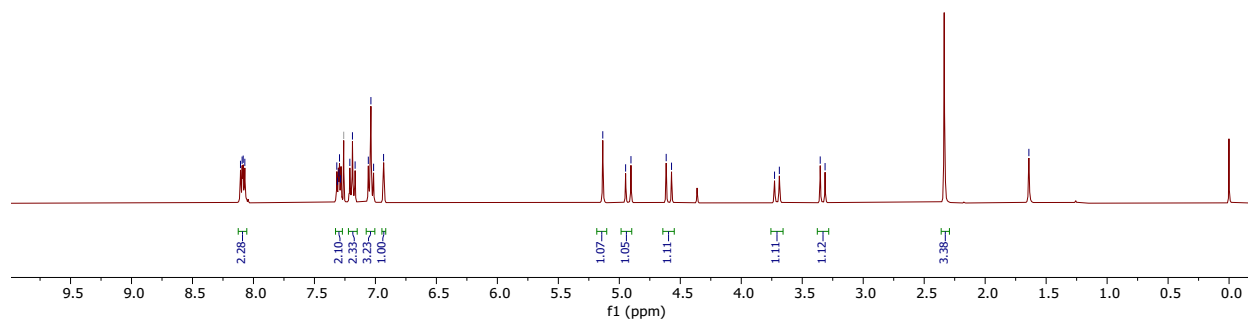

PM-33A\_13C.10.fid  
PM-33A\_13C

195.446  
167.280  
164.749  
164.474  
162.000  
157.214  
154.584  
143.627  
136.357  
136.325  
134.965  
134.746  
133.516  
133.487  
132.994  
131.035  
130.942  
129.189  
126.993  
126.908  
116.874  
116.859  
115.954  
115.842  
85.957  
77.478  
77.160 CDCl<sub>3</sub>  
77.153  
45.447  
45.270  
21.621

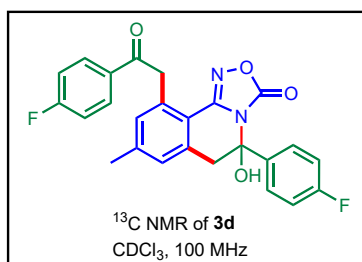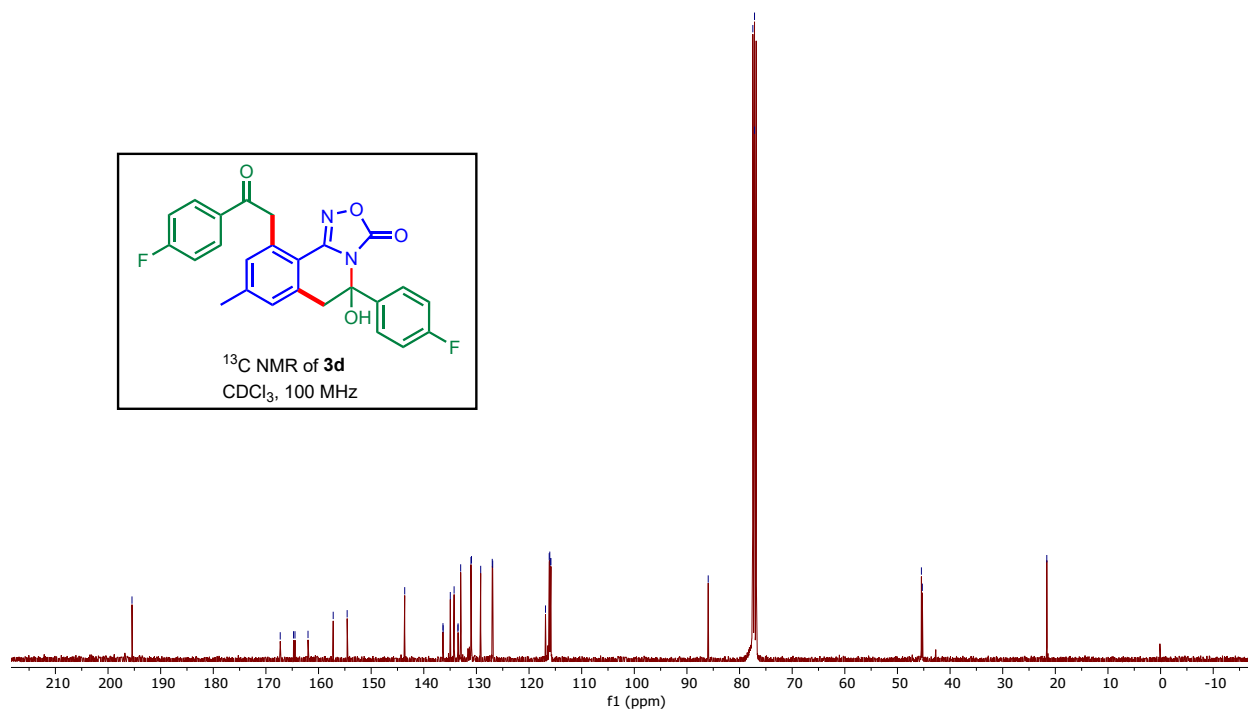

PM-33A\_19F.12.fid  
PM-33A\_19F

— -104.906  
— -112.361

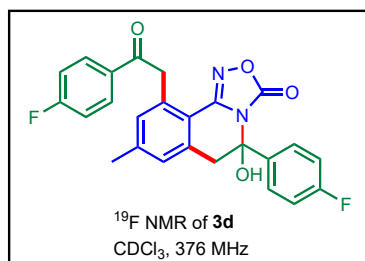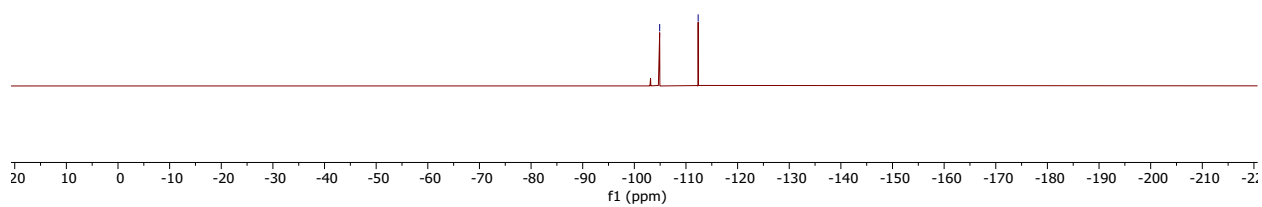

K2PTC-BCD.1.fid

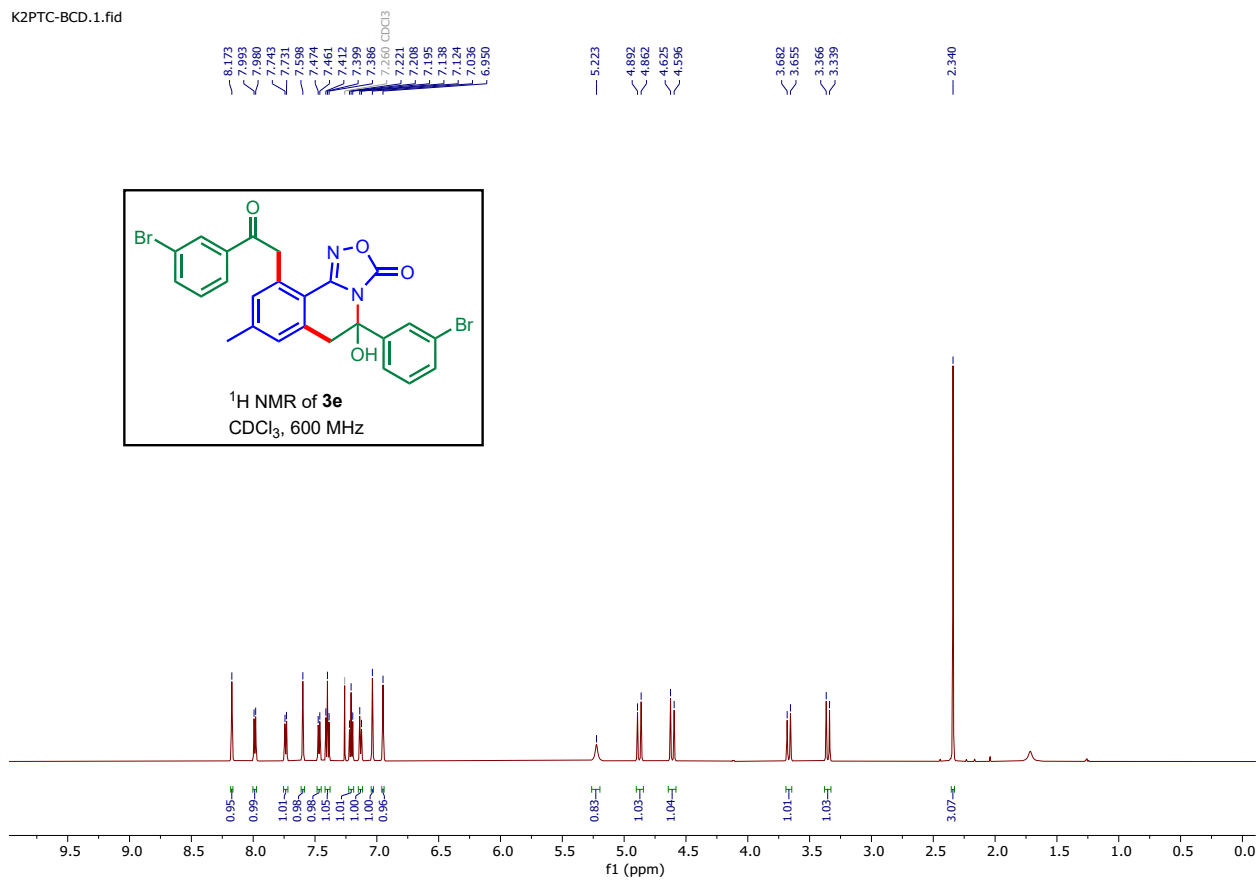

K2PTC-BCD.2.fid

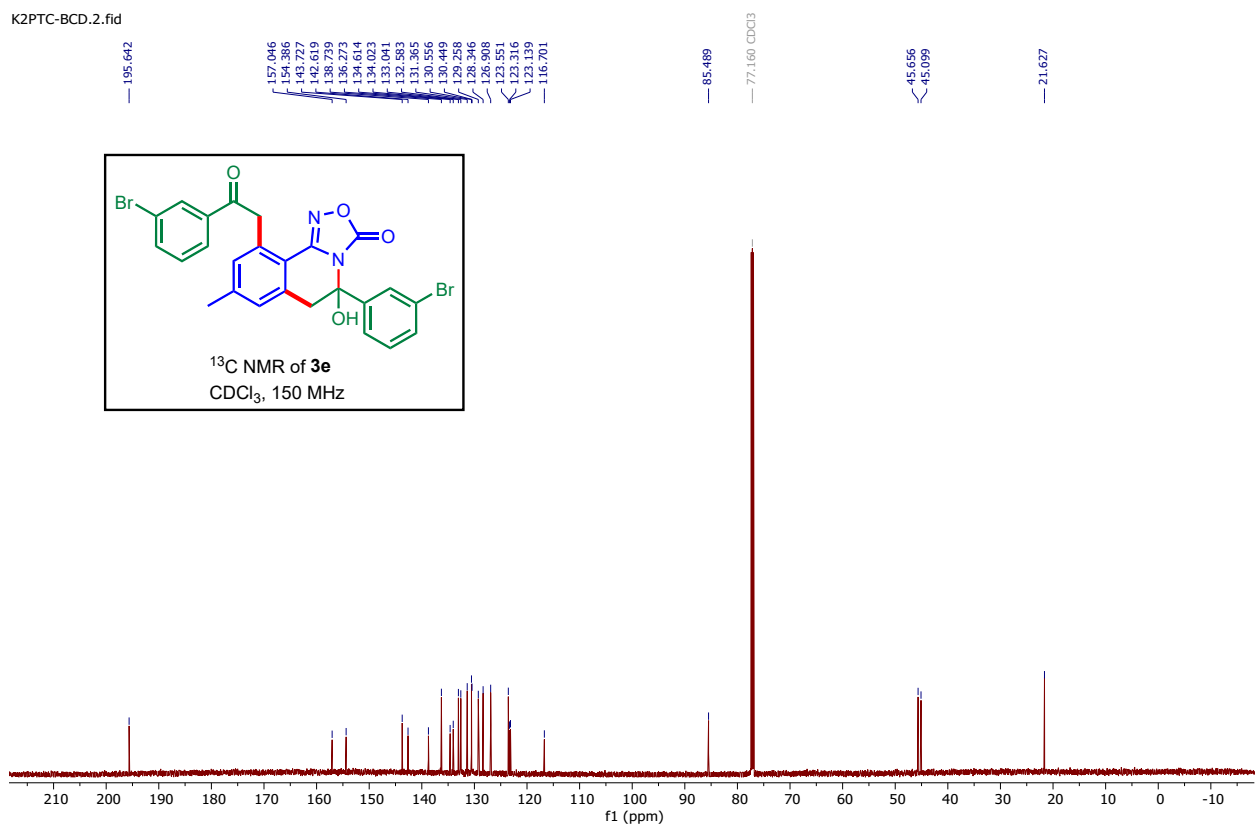

PM-32A-1H.1.fid  
PM-32A-1H

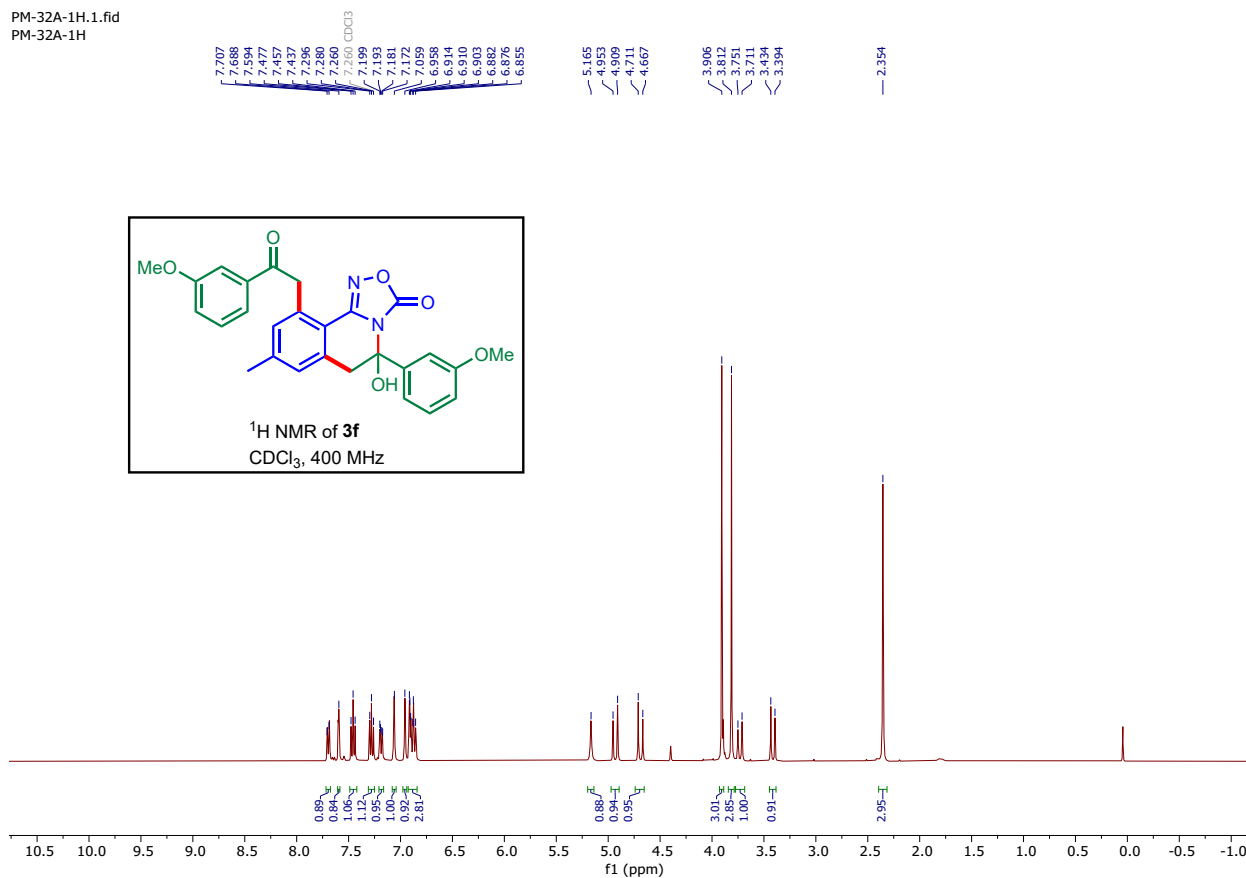

PM-32A\_13C.10.fid  
PM-32A\_13C

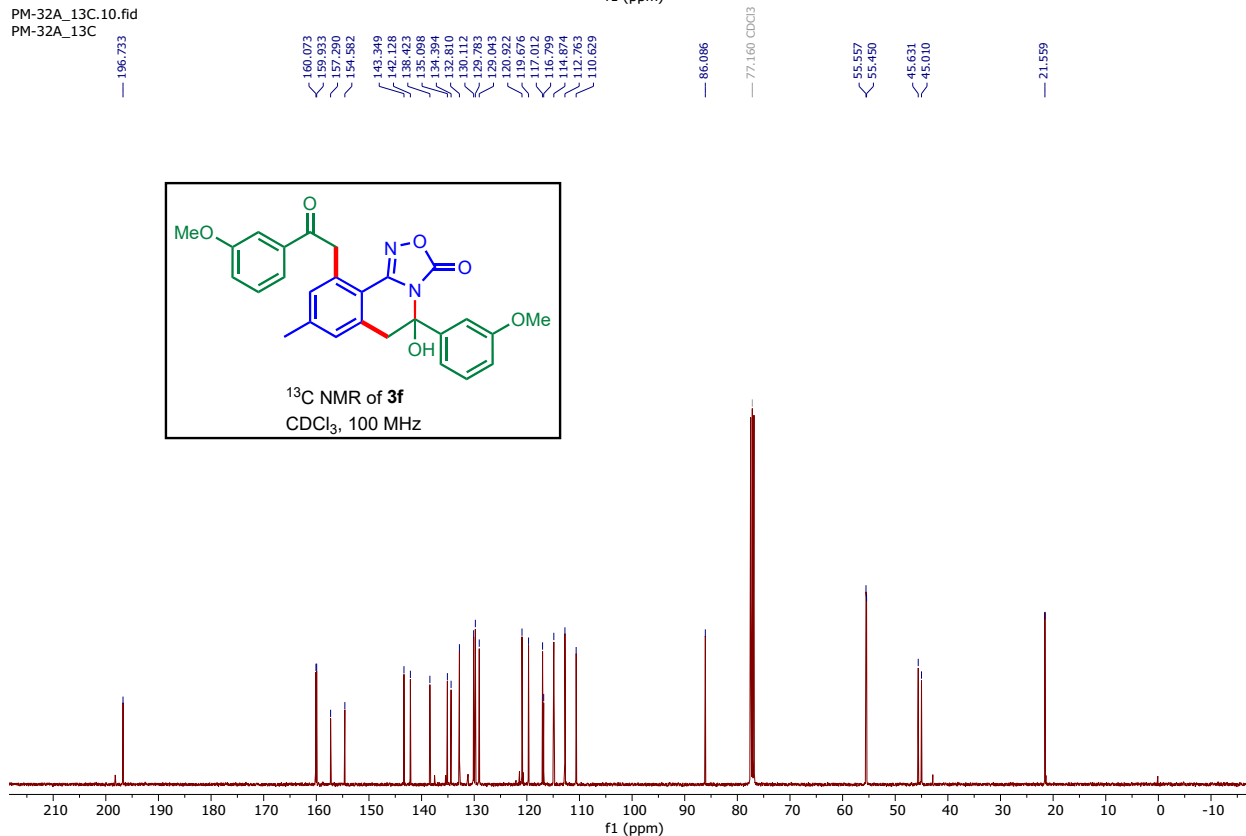

Ph-35A-1H.1.fid  
1H

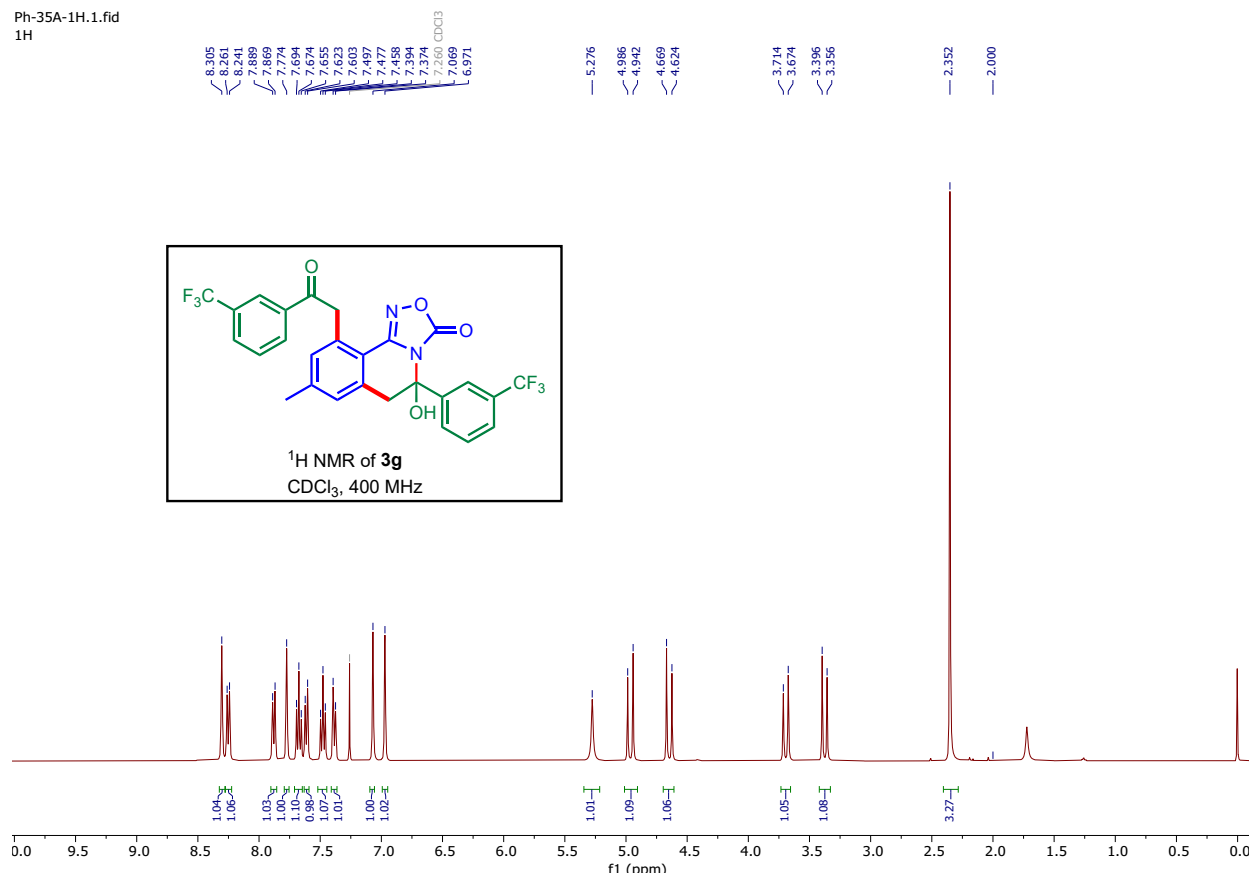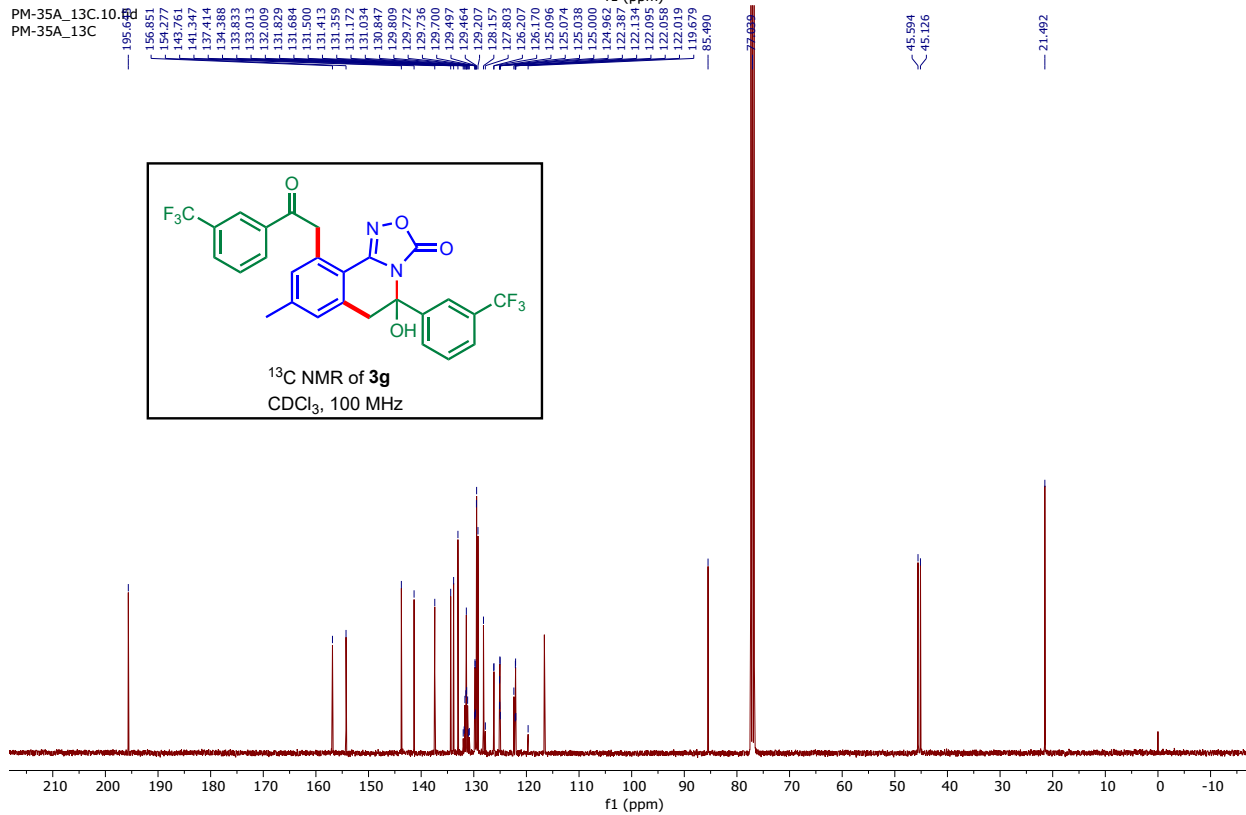

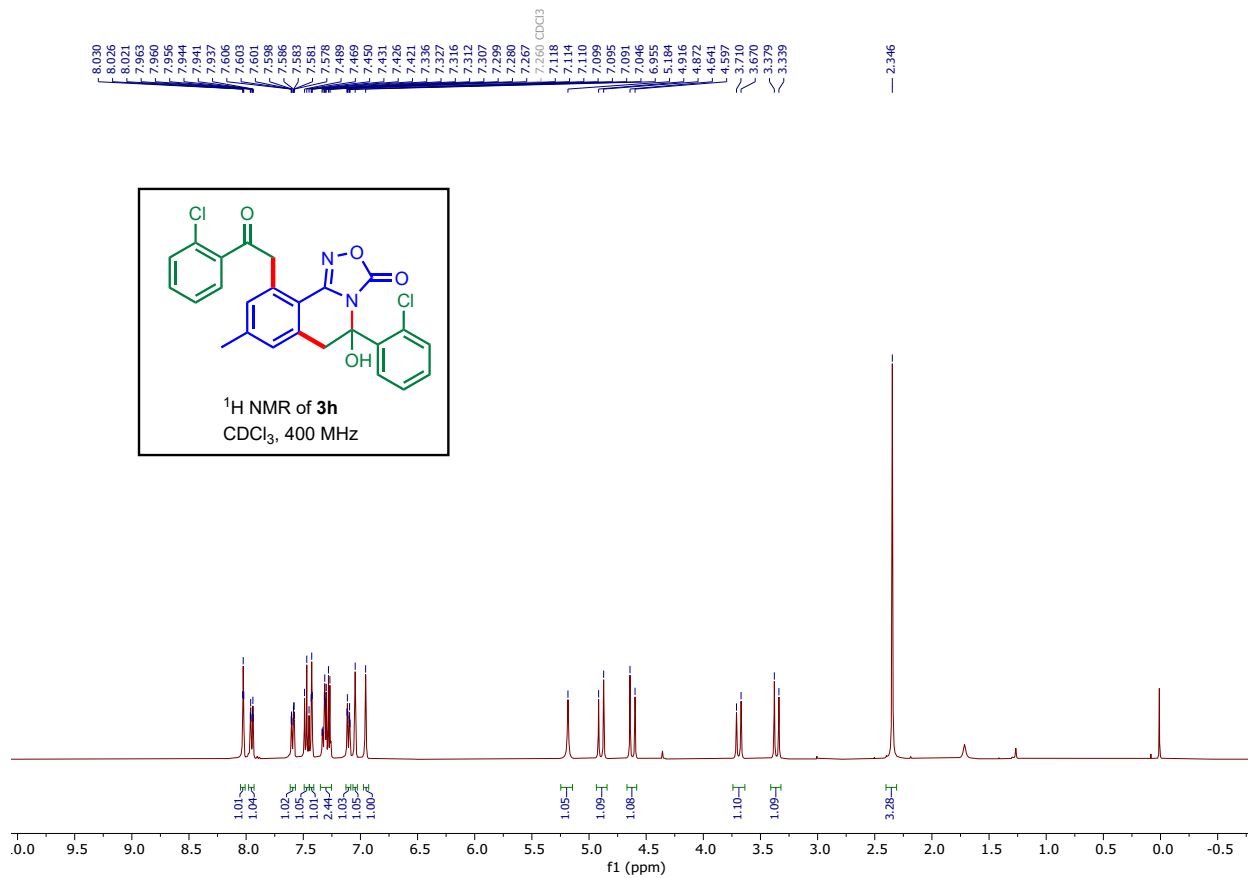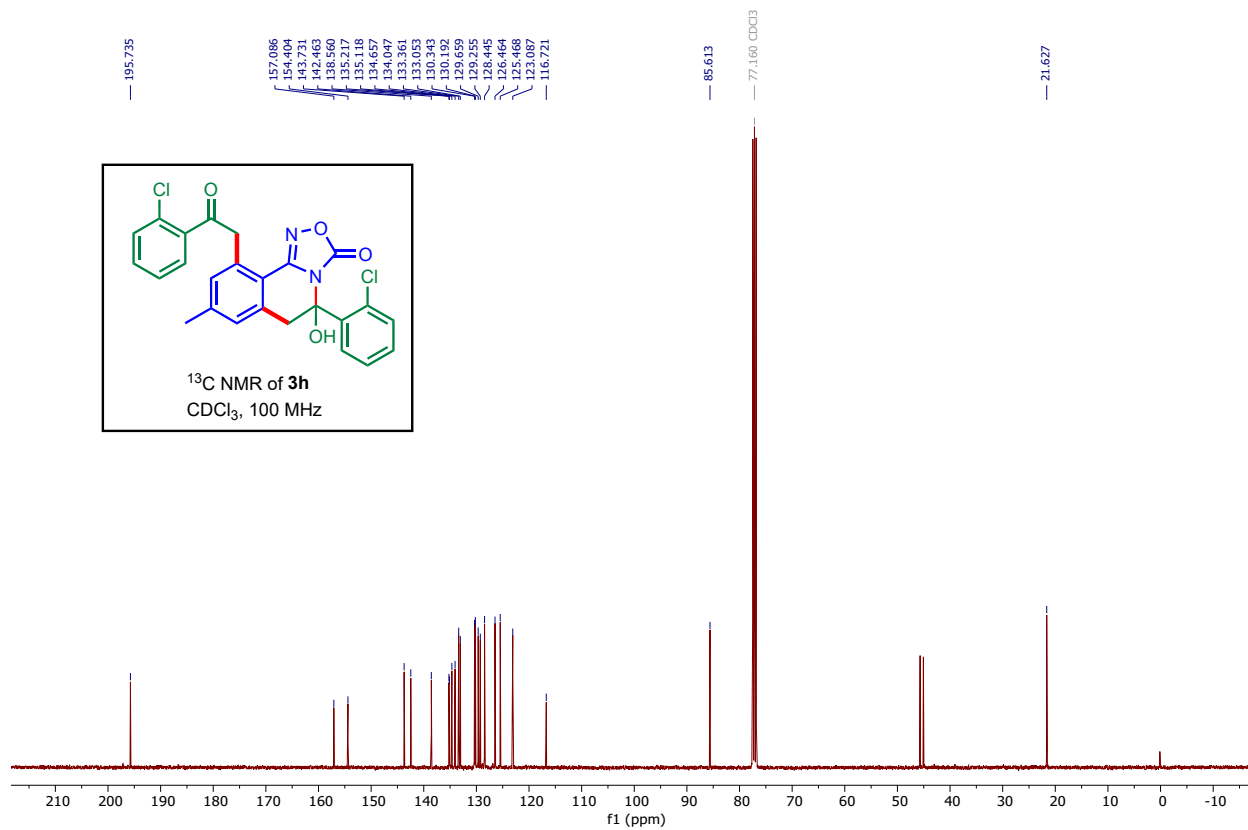

PM-37A-1H.1.fid  
PM-37A-1H

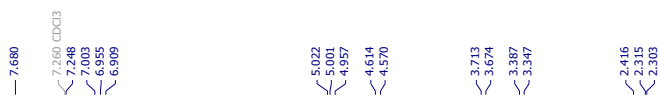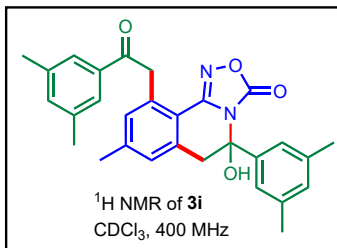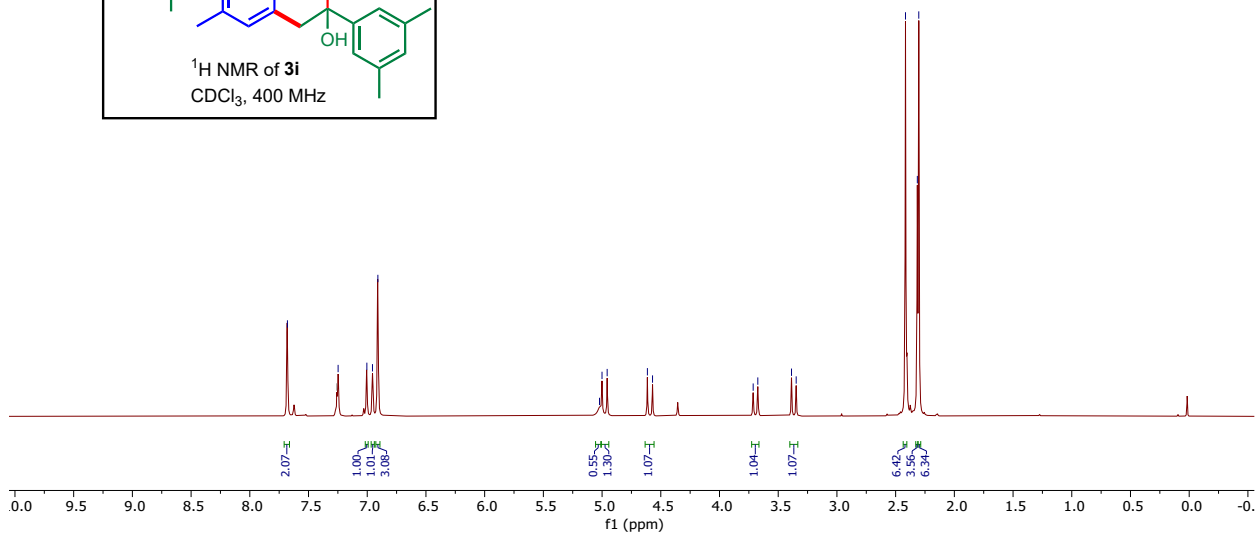

PM-37A\_13C.10.fid  
PM-37A\_13C

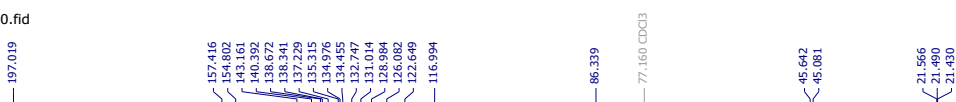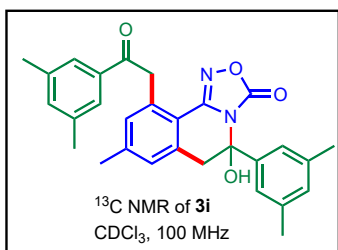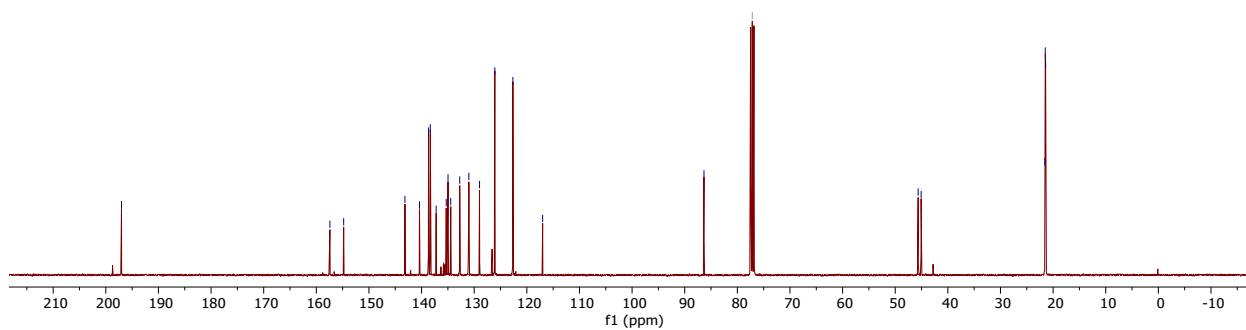



1 (2)/1

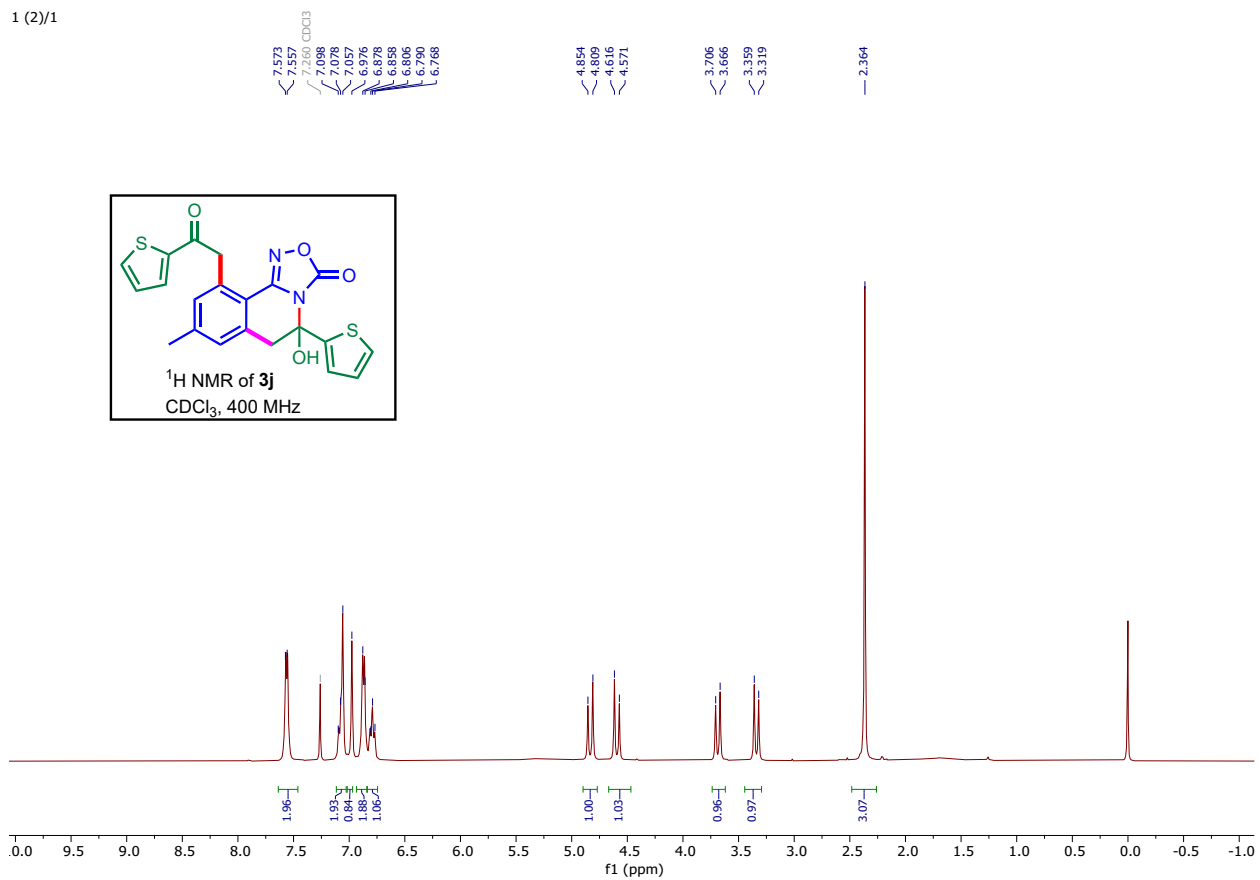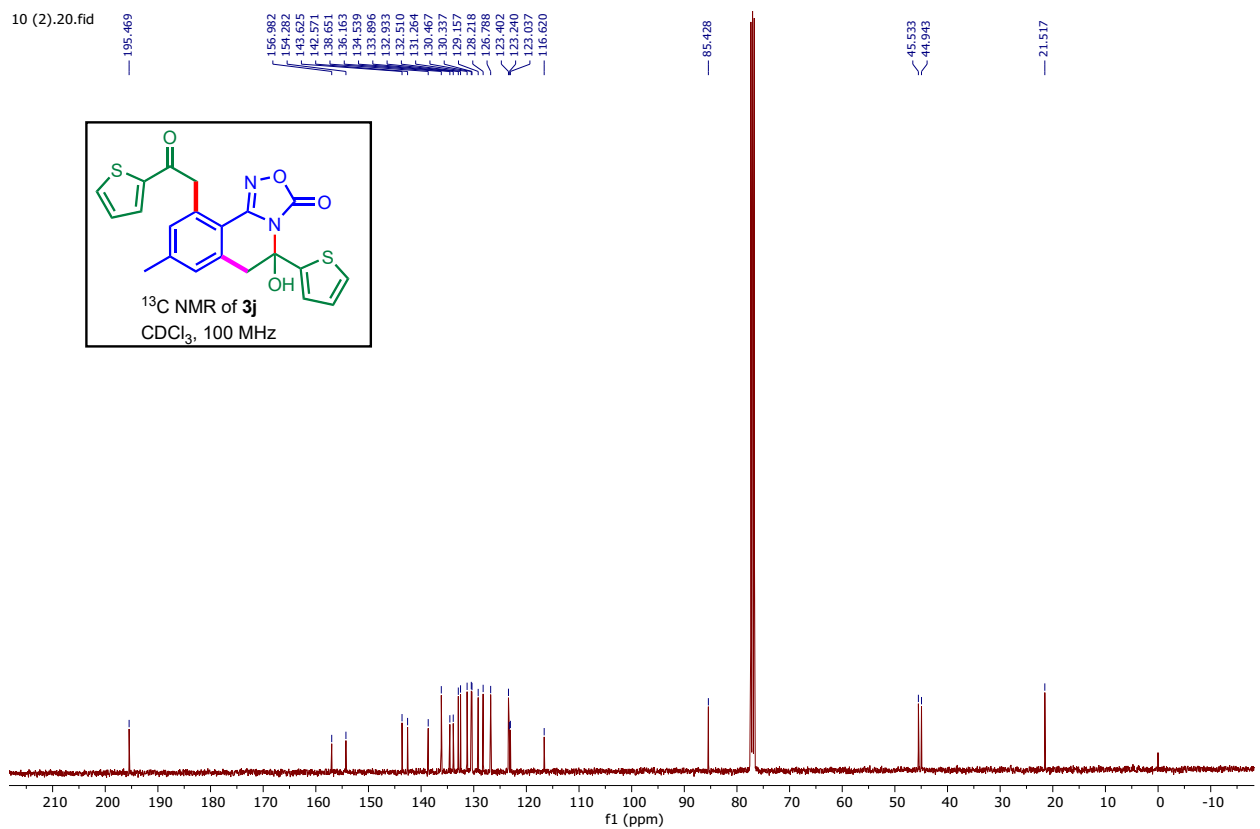

PM-34-A-1H.1.fid  
PM-34-A-1H

8.672  
8.161  
8.157  
8.140  
8.135  
8.050  
8.032  
7.977  
7.955  
7.944  
7.914  
7.898  
7.870  
7.847  
7.818  
7.812  
7.808  
7.802  
7.792  
7.771  
7.706  
7.660  
7.656  
7.643  
7.639  
7.636  
7.623  
7.612  
7.612  
7.608  
7.595  
7.592  
7.588  
7.575  
7.571  
7.535  
7.530  
7.530  
7.502  
7.497  
7.494  
7.488  
7.477  
7.477  
7.260 CDCl<sub>3</sub>  
7.066  
6.998  
6.966  
5.203  
5.159  
4.805  
4.762  
3.820  
3.780  
3.494  
3.454

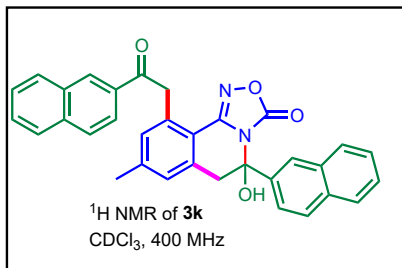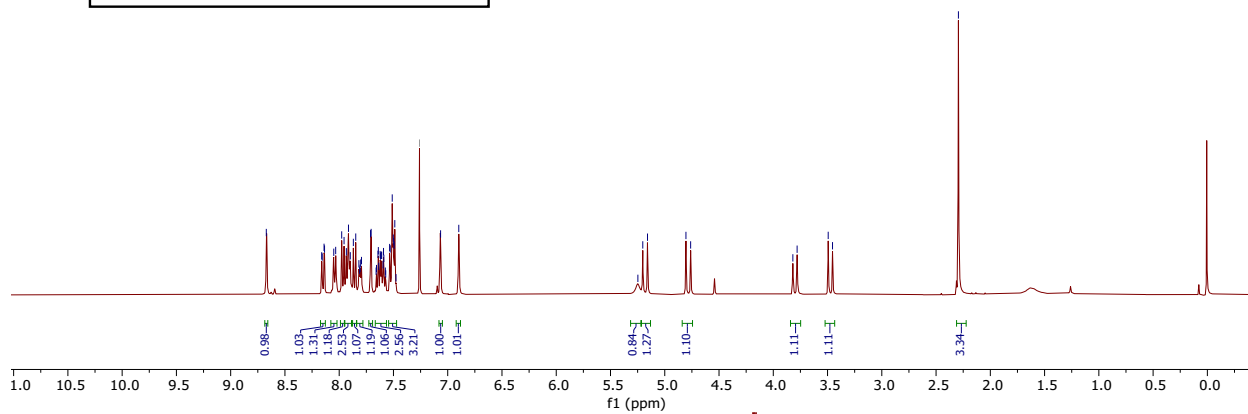

PM-34A\_13C.10.fid  
PM-34A\_13C

196.841

157.466

156.916

143.463

137.481

136.996

136.996

134.570

134.418

133.517

132.944

132.921

132.753

130.043

129.868

129.868

129.185

128.925

128.650

127.988

127.620

127.089

126.952

124.457

124.457

124.166

122.406

117.110

86.599

45.645

45.099

21.591

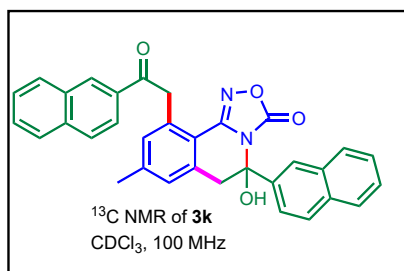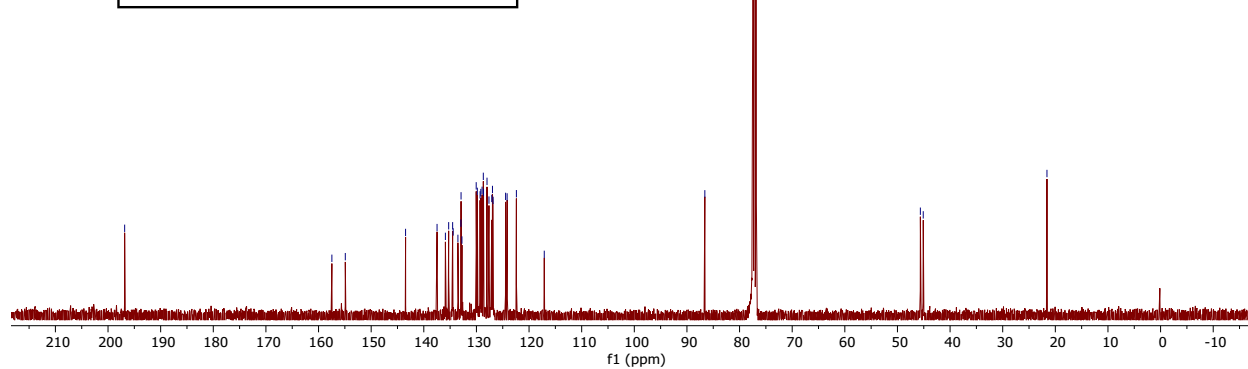

PM-P-16-1H.1.fid

PM-P-16-1H

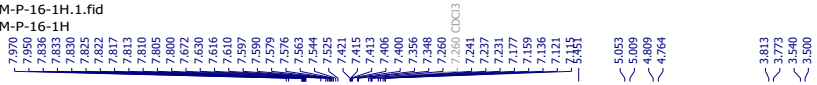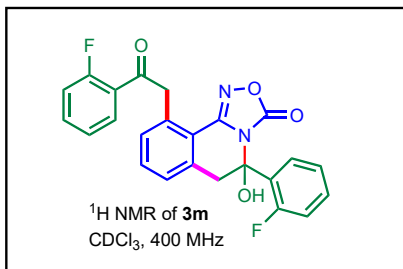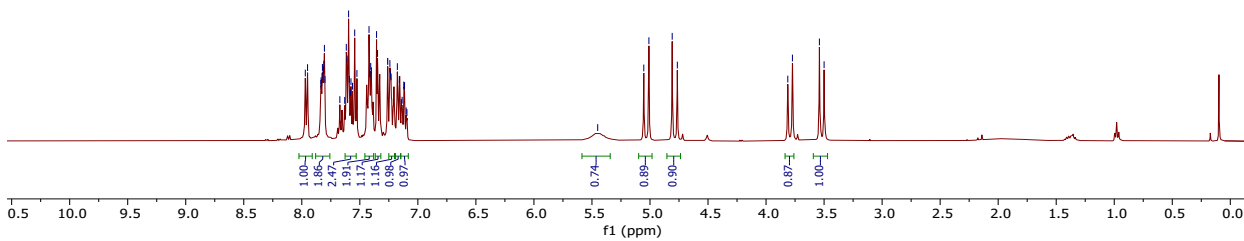

PM-P-16\_13C.10.1.1r

PM-P-16\_13C

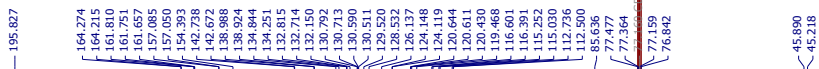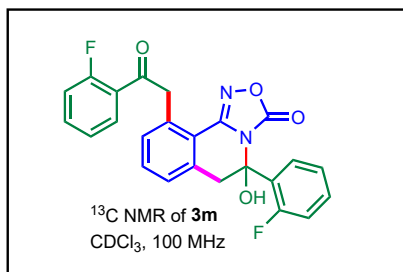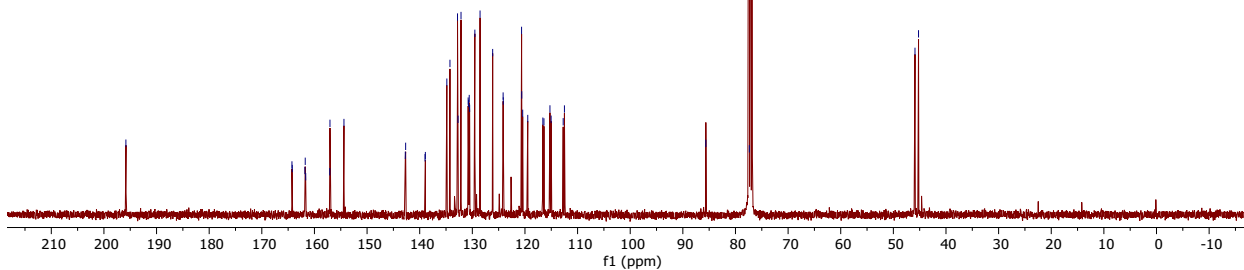

PM-P-17-1H.1.fid  
PM-P-17-1H

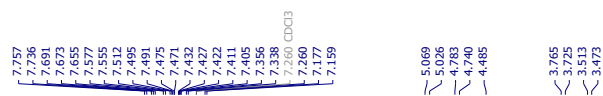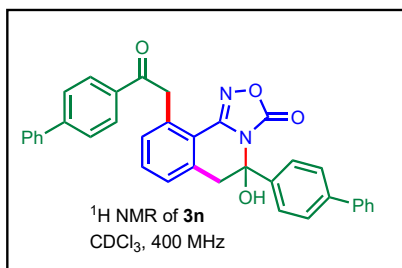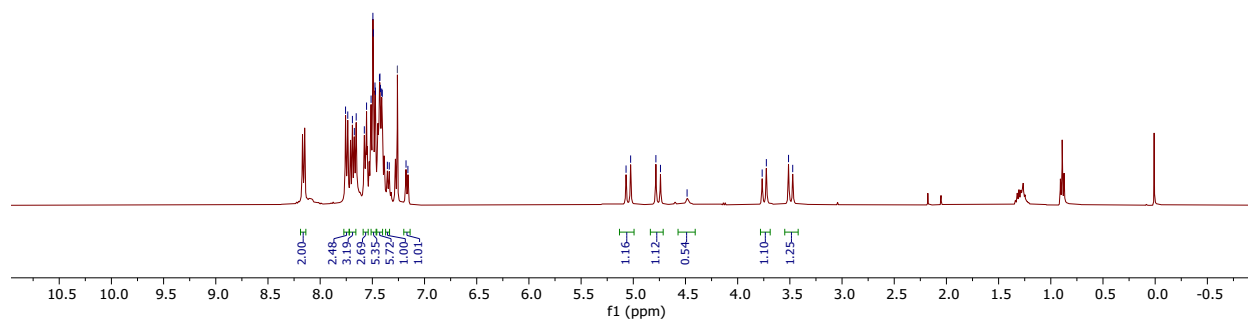

PM-P-17-13C.3.fid  
PM-P-17-13C

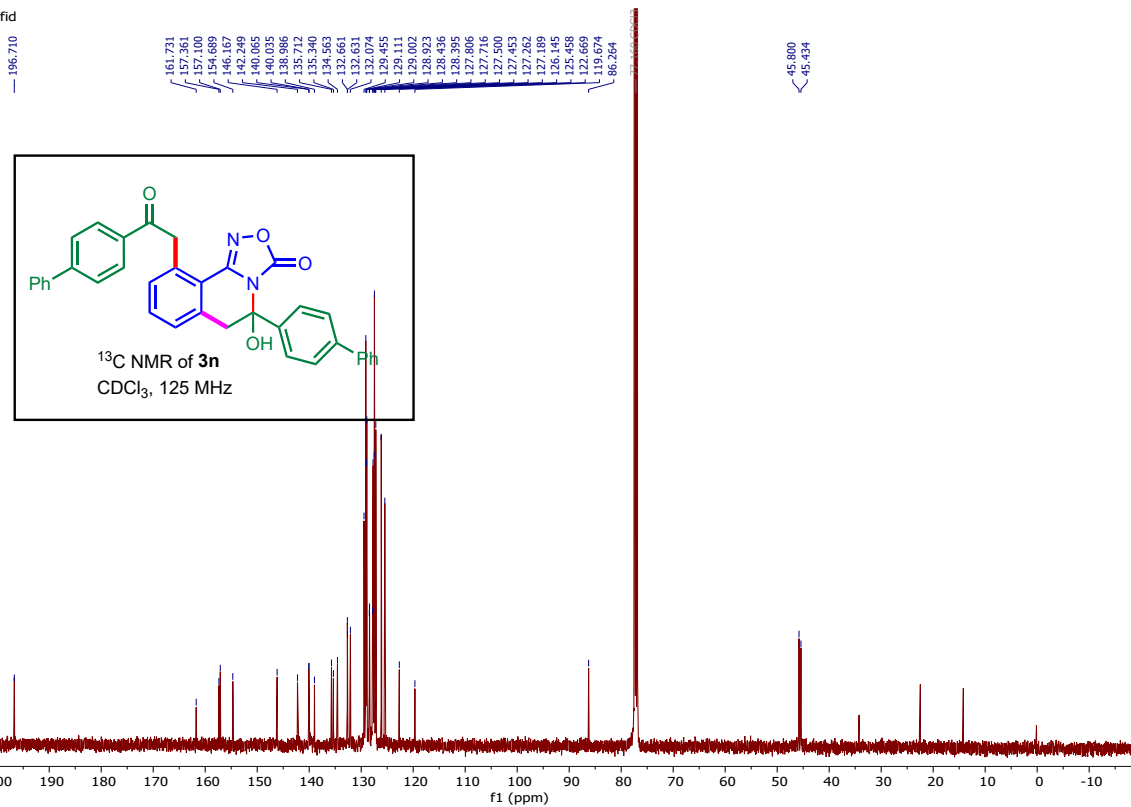

PM-P-7-1H.1.fid  
PM-P-7-1H

8.010  
7.596  
7.585  
7.485  
7.460  
7.452  
7.441  
7.430  
7.421  
7.344  
7.322  
7.260, CDCl<sub>3</sub>  
7.243  
7.226  
7.145  
7.126  
4.982  
4.938  
4.664  
4.620  
3.741  
3.701  
3.410  
3.370

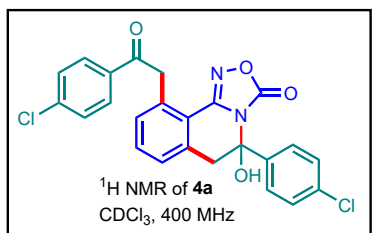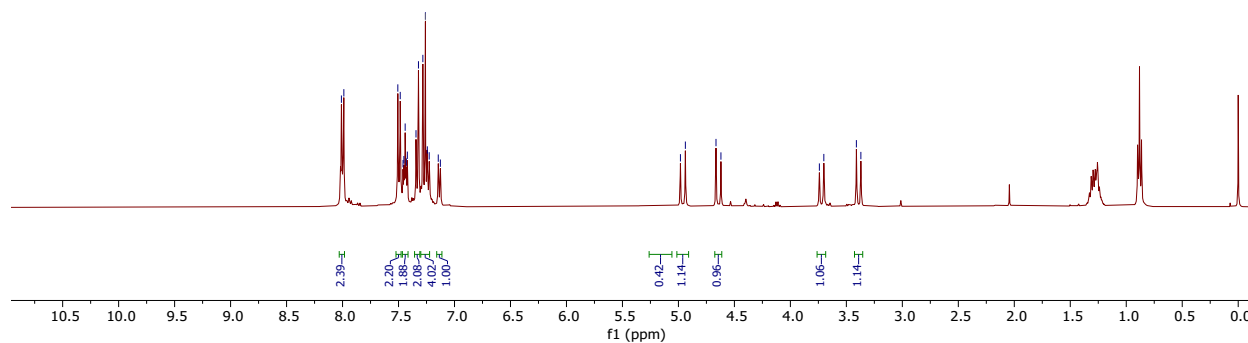

TP-PM-P-7\_13C.10.fid  
TP-PM-P-7\_13C

195.692  
157.058  
154.474  
152.472  
138.763  
135.574  
135.337  
135.032  
134.221  
132.784  
132.141  
131.682  
129.767  
129.309  
129.183  
129.002  
128.525  
126.453  
119.645  
85.875  
45.653  
45.269

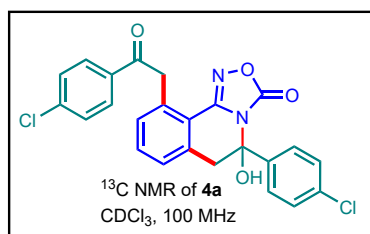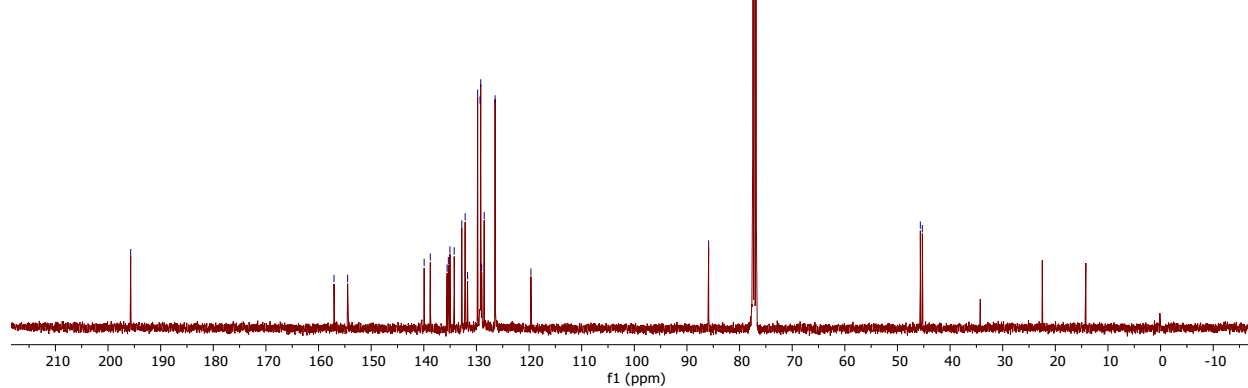

PM-P-5-1H.1.fid  
PM-P-5-1H

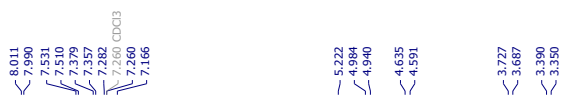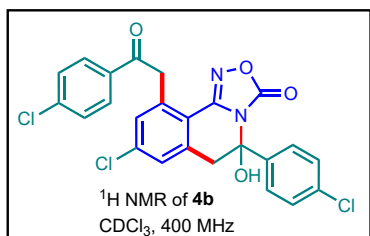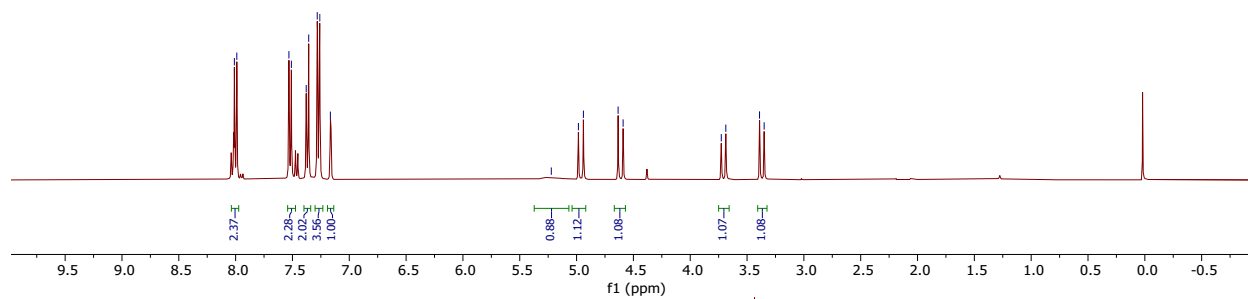

TP-PM-P-5\_13C.10.fid  
TP-PM-P-5\_13C

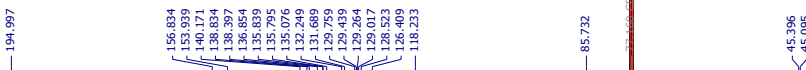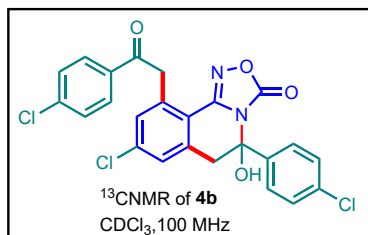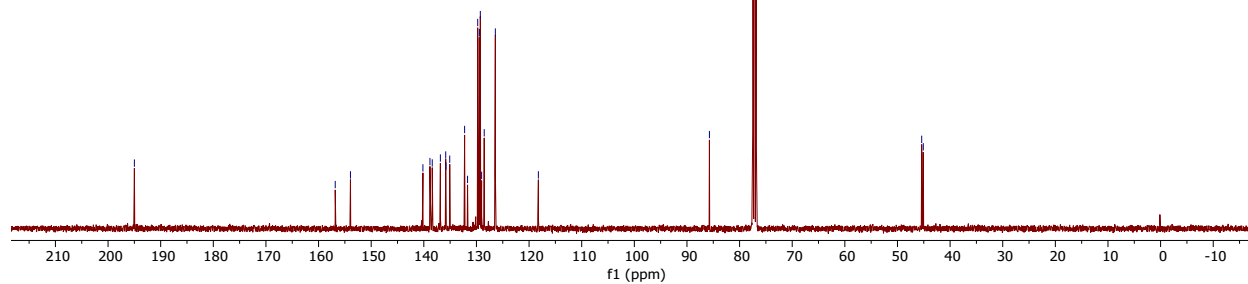

PM-P-15-1H.1.fid  
PM-P-15-1H

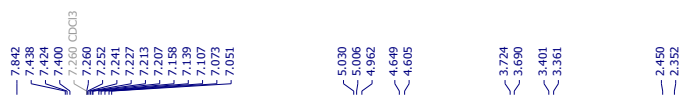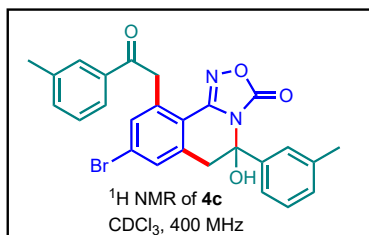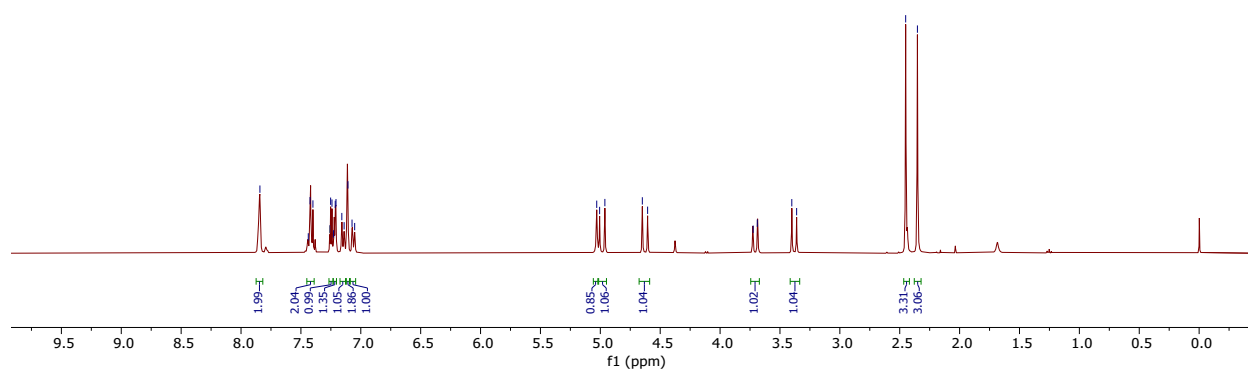

PM-P-15\_13C.10.fid  
PM-P-15\_13C

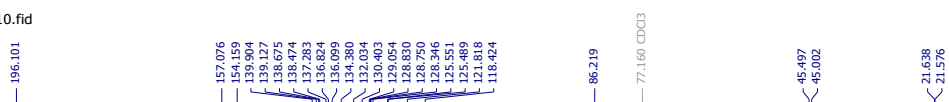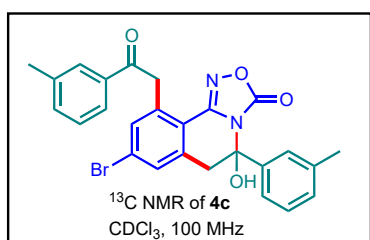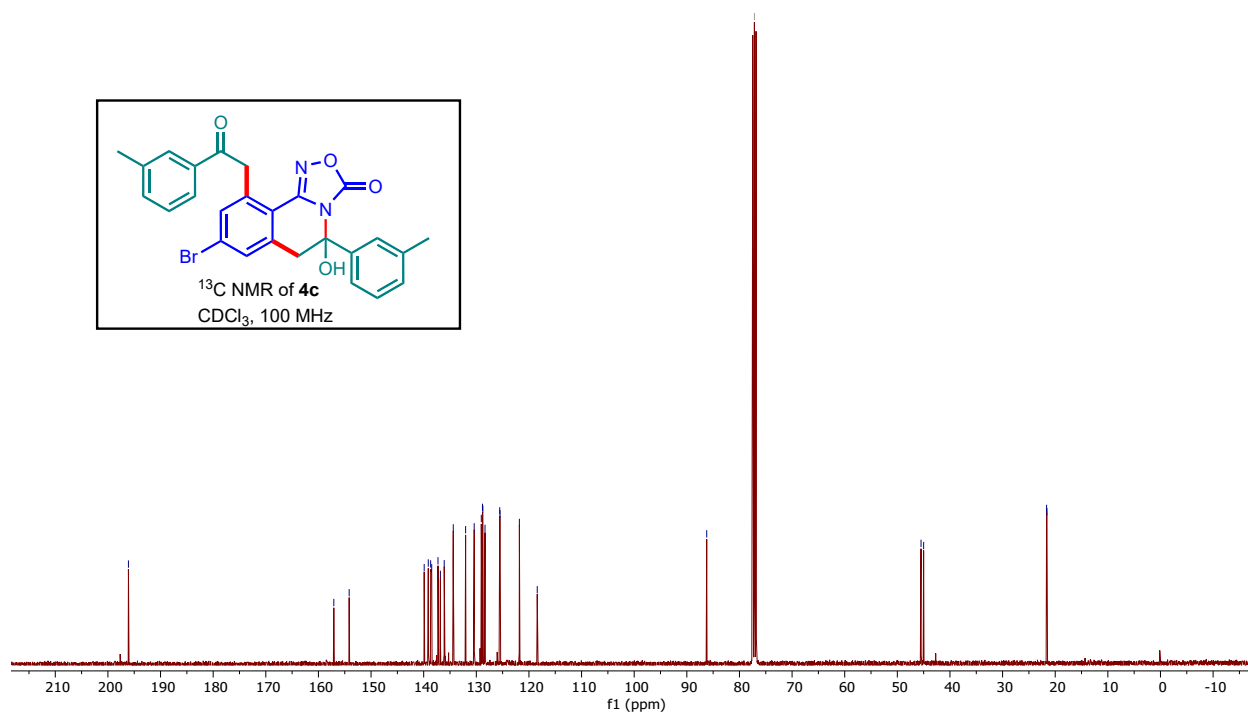

PM-P-15\_DEPT135.12.fid  
PM-P-15\_DEPT135

134.284  
131.937  
130.304  
128.956  
128.732  
128.652  
128.248  
125.453  
125.390  
121.720

45.399  
44.903

21.542  
21.479

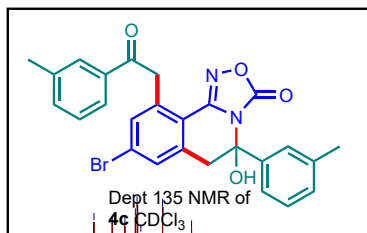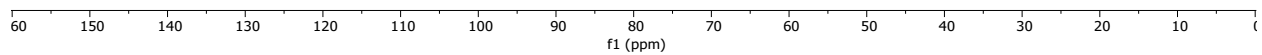



PM-P-10-1H.1.fid  
PM-P-10-1H

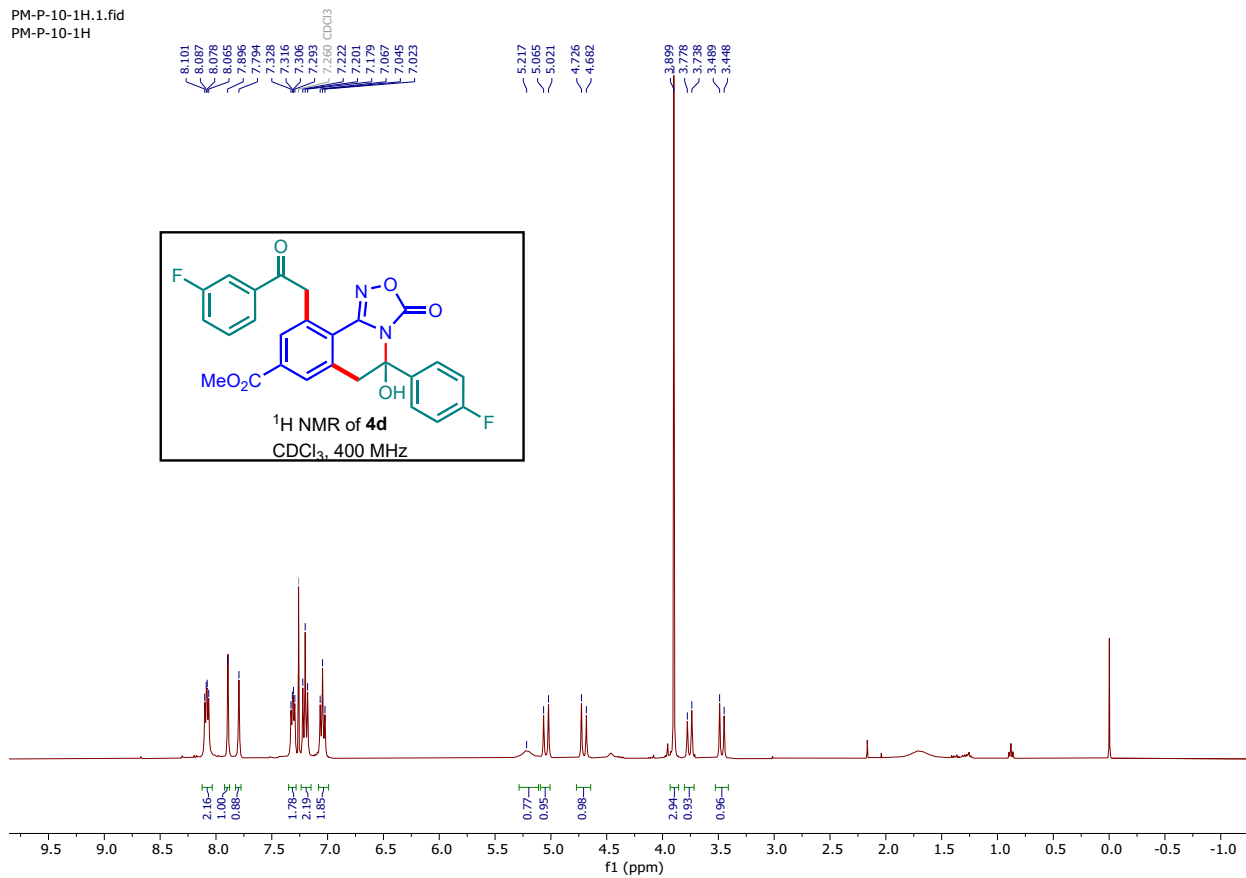

PM-P-10\_13C.10.fid  
PM-P-10\_13C

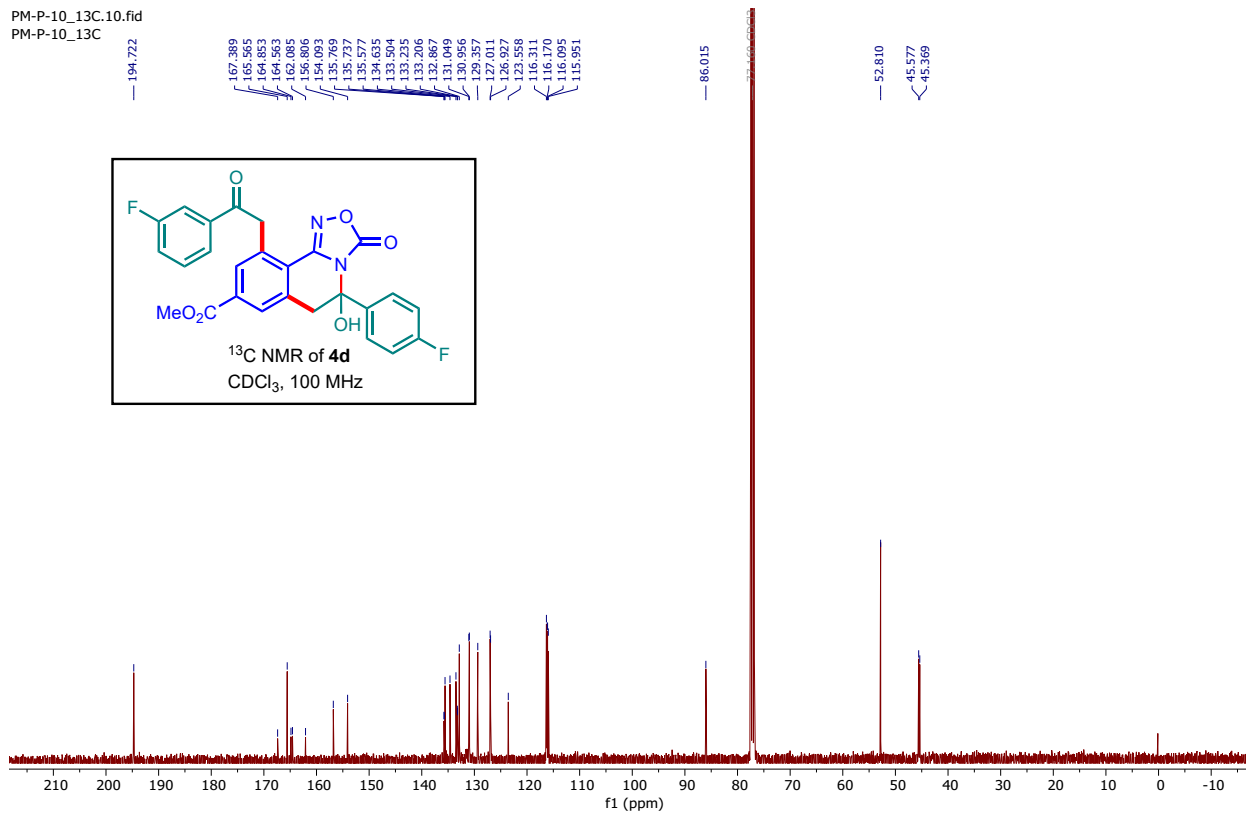

PM-P-10\_19F.12.fid  
PM-P-10\_19F

-104.403  
-111.926

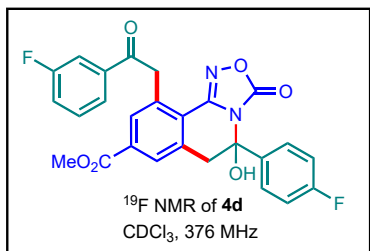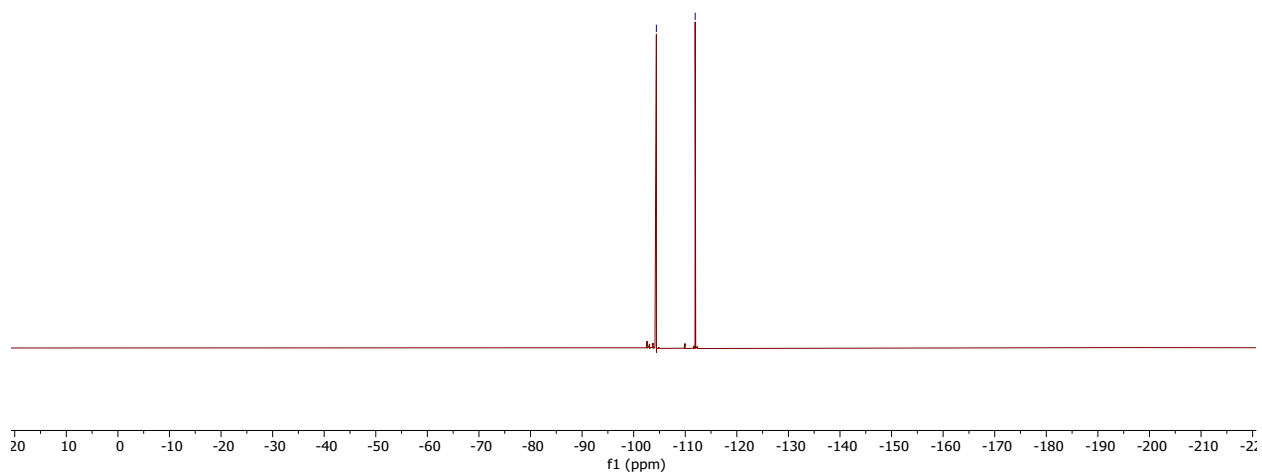

PM-P-8-1H.1.fid  
PM-P-8-1H

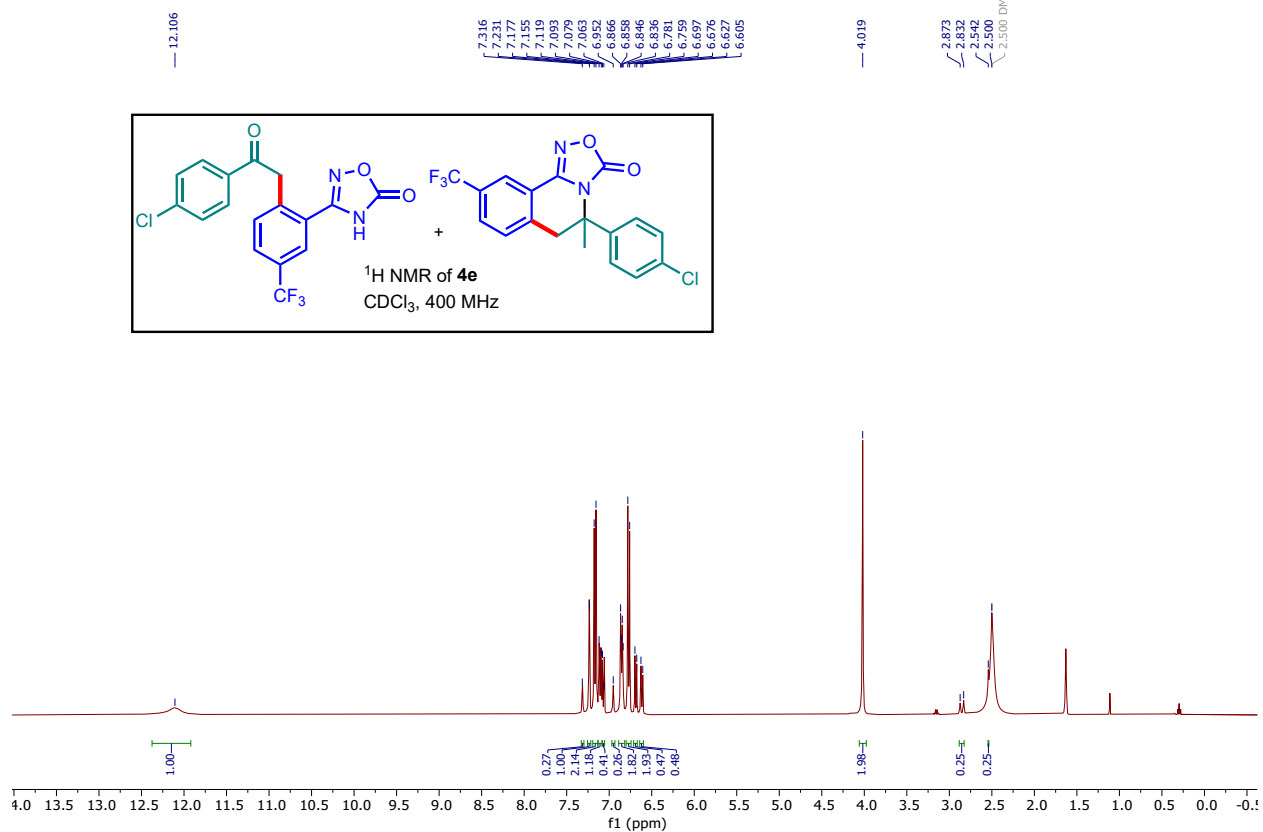

PM-P-8\_13C.10.fid  
PM-P-8\_13C

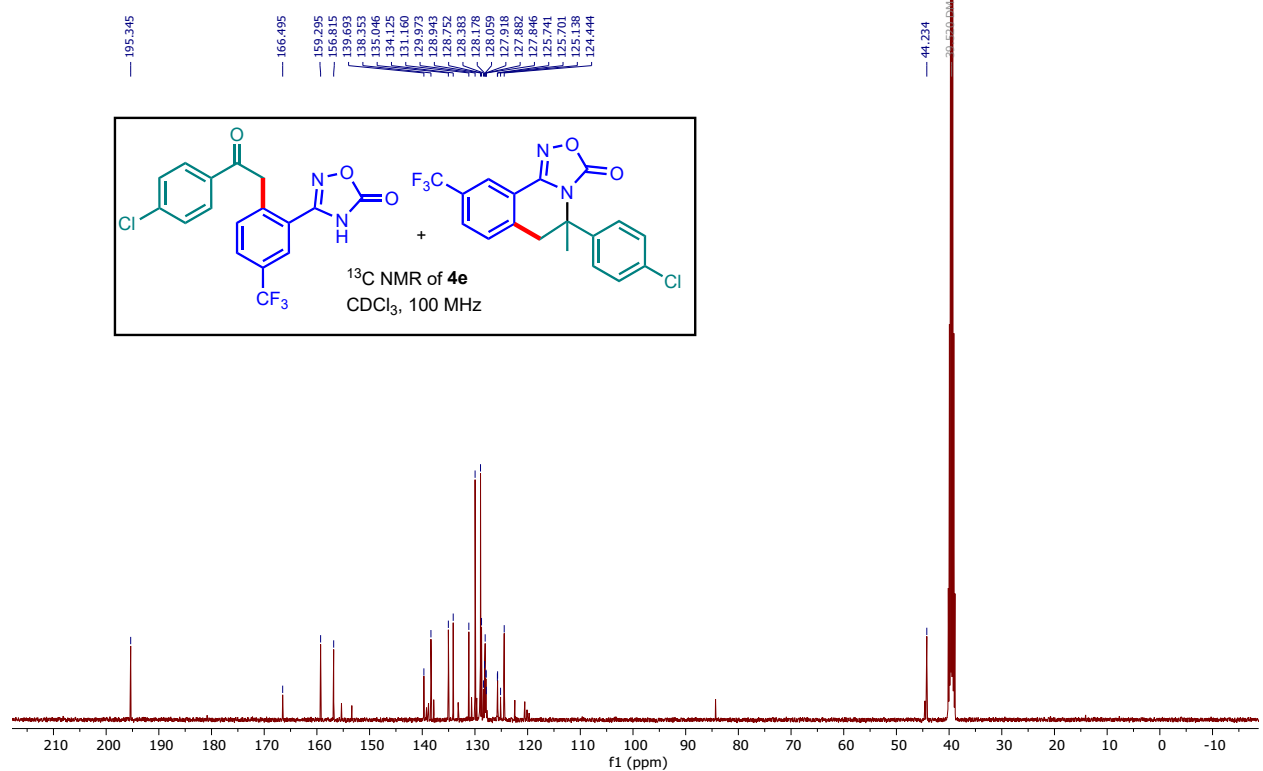

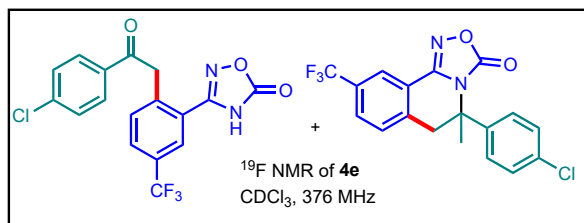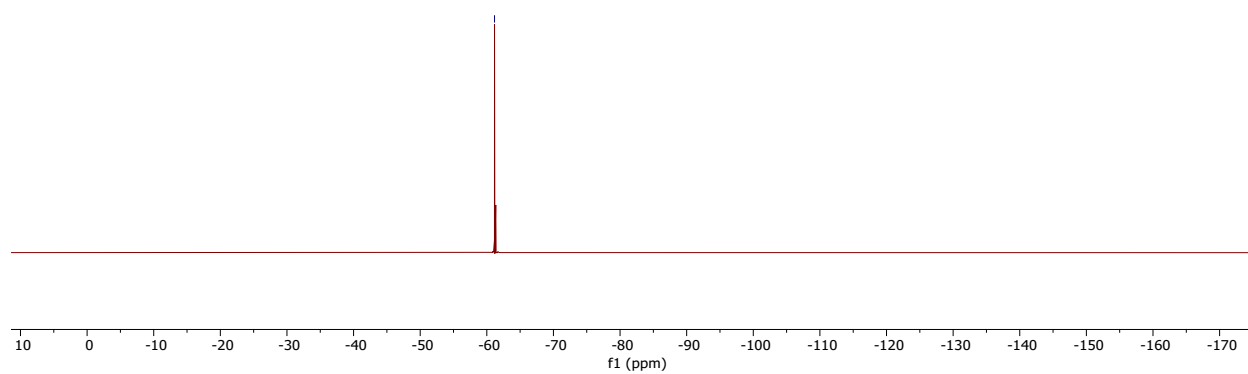

PM-P-11-1H.1.fid  
PM-P-11-1H

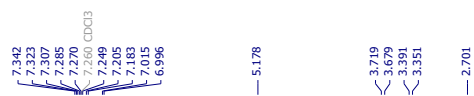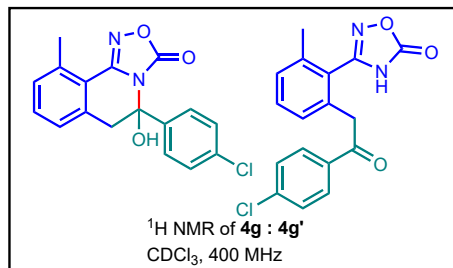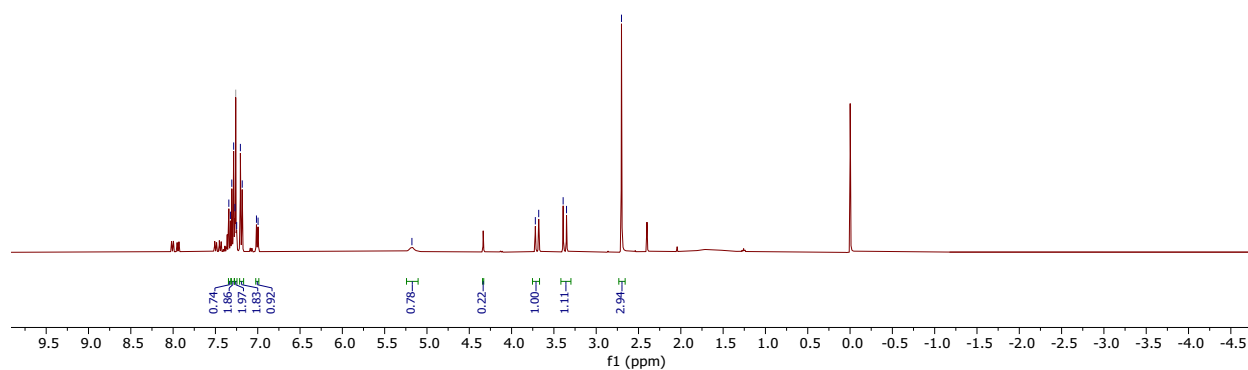

PM-P-11\_13C.10.fid  
PM-P-11\_13C

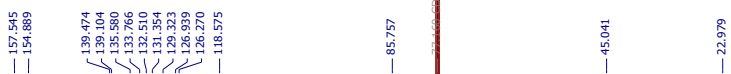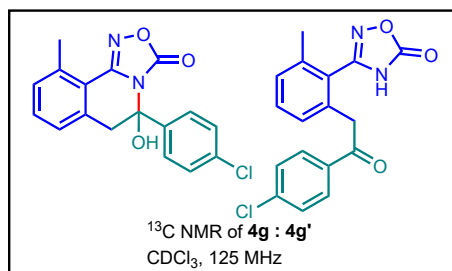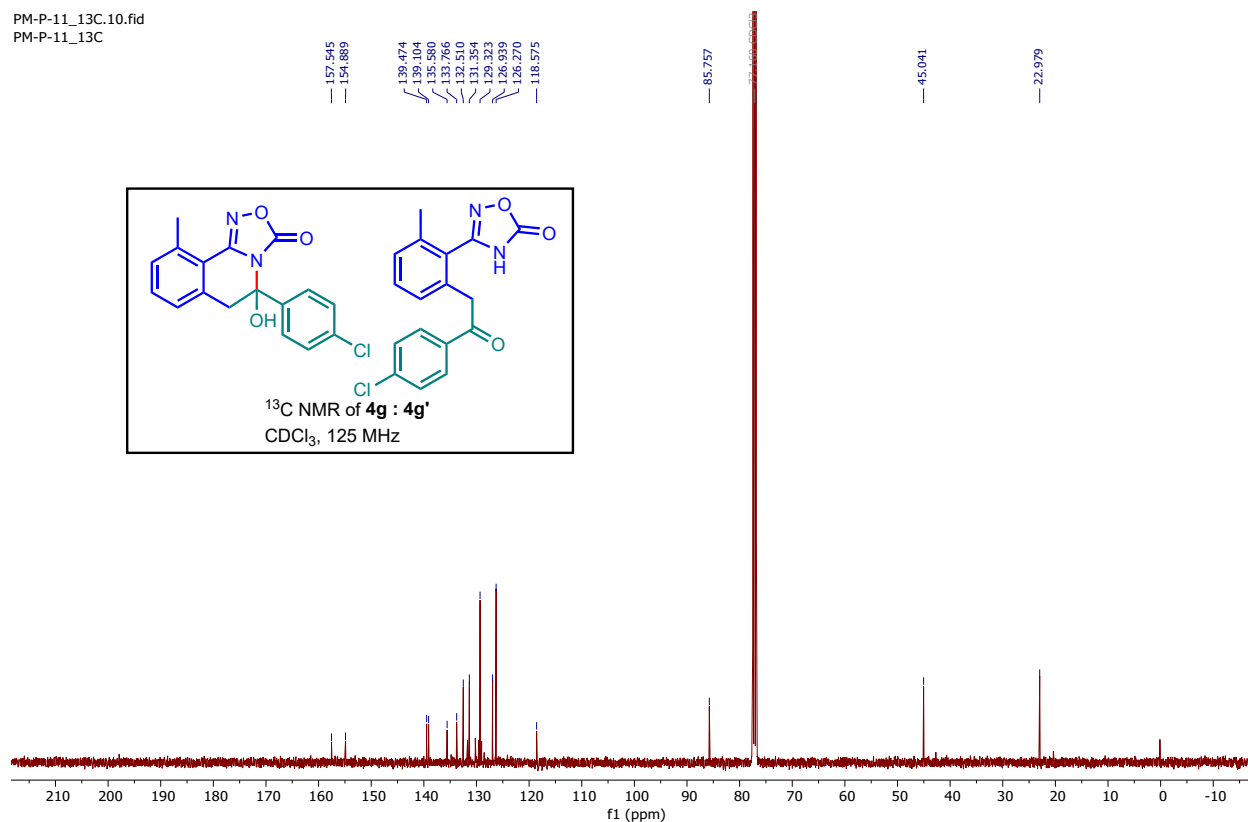

PM-P-18-1H.1.1.1r  
PM-P-18-1H

7.747  
7.663  
7.622  
7.655  
7.435  
7.400  
7.391  
7.380  
7.372  
7.351  
7.251  
7.242  
7.149  
7.130  
7.113

4.471

2.424

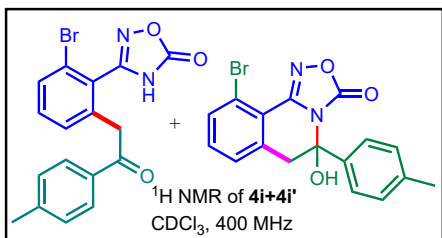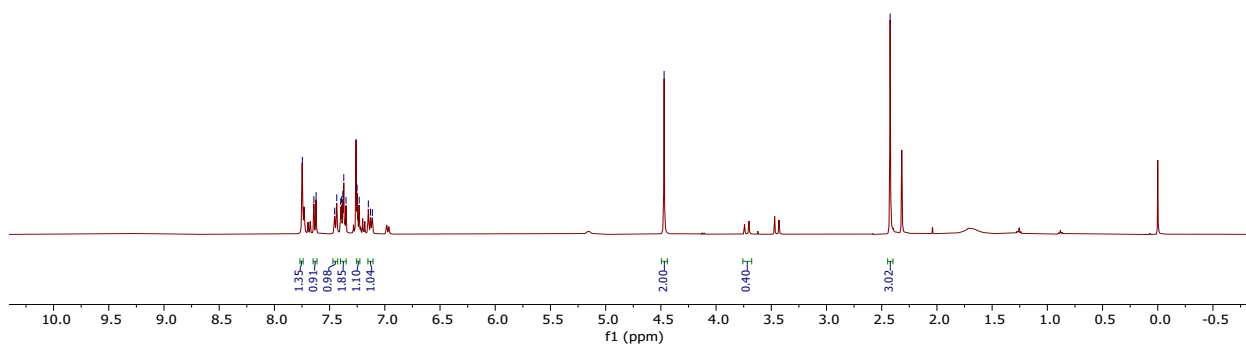

PM-P-18-13C.1.fid  
PM-P-18-13C

197.651

158.844  
156.001

138.073  
137.804  
136.896  
136.815  
133.015  
132.424  
130.346  
129.098  
128.995  
125.830

43.608

21.492

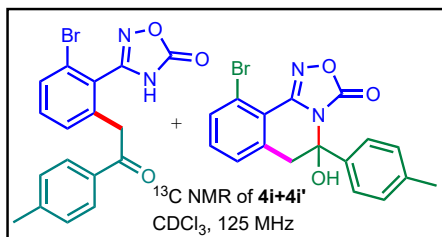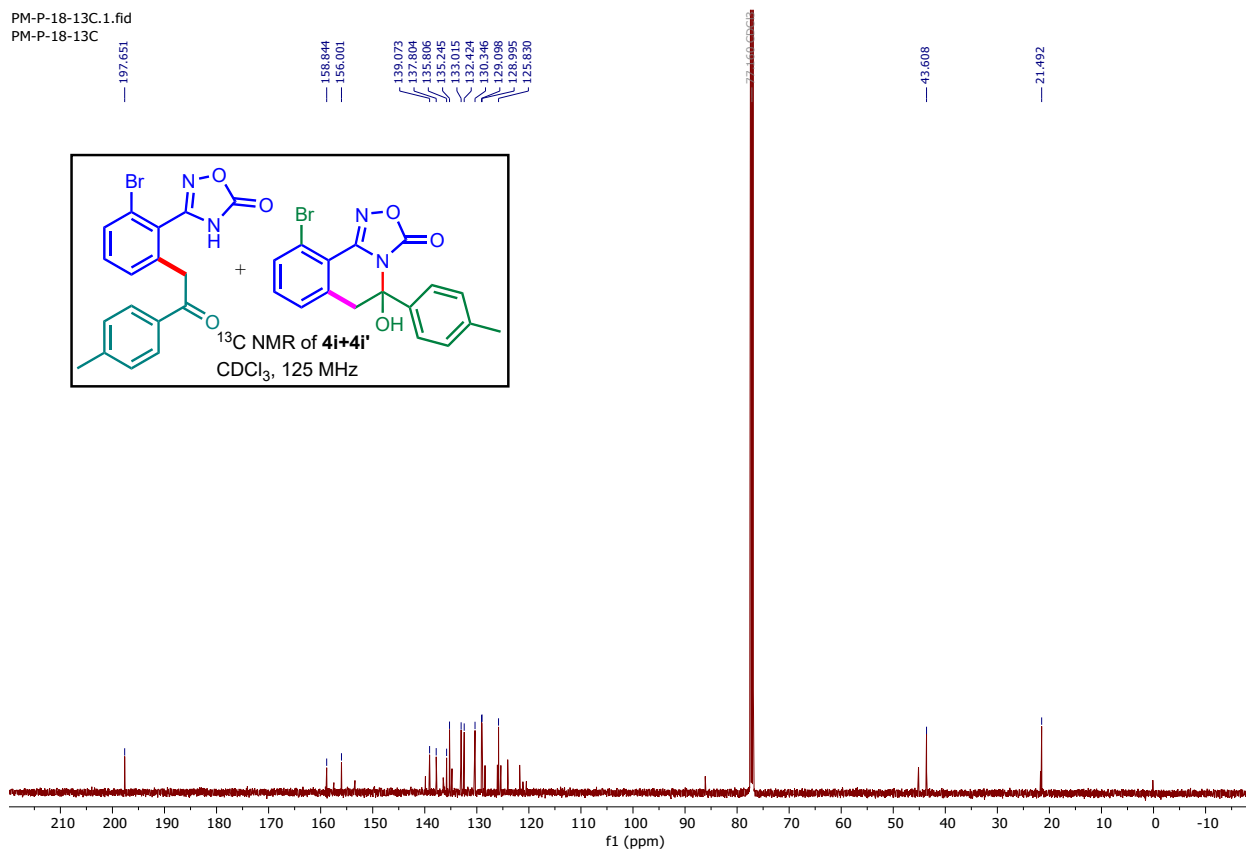

### 5.1. Experimental procedure for anti-inflammatory activity

The synthesized compound and standard diclofenac sodium were screened for anti-inflammatory activity by inhibiting the albumin denaturation technique with minor modification. The standard drug and compound were dissolved in a minimum quantity of Dimethyl formamide (DMF) and diluted with phosphate buffer (0.2 M, pH 7.4). The final concentration of DMF in all solutions was less than 2.5%. Test Solution (2.5 mL) containing different drug concentrations was mixed with 1 mL of 1 mM Bovine serum albumin solution in phosphate buffer and incubated at 37 °C in an incubator for 10 min. Denaturation was induced by keeping the reaction mixture at 70 °C in a water bath for 10 min. After cooling, the turbidity was measured at 660 nm. The percentage inhibition of denaturation can be calculated from a reference where no drug was added. We noted that each experiment was done in triplicate and an average value was taken. The percentage inhibition of denaturation was calculated using the following formula:

$$\% \text{ of Inhibition} = 100 \times [A_c - A_t / A_c]$$

$A_t$ : Absorbance of test

$A_c$ : Absorbance of control.

### 5.2 Anti-diabetic activity $\alpha$ -amylase inhibition technique

The antidiabetic activity of the samples was performed using the  $\alpha$ -amylase inhibition method. Briefly, Amylase (0.2%) was incubated with and without samples (in 1.5 mL) and standard for 10 min at 25 °C. This experiment was performed in 0.2 M phosphate buffer (pH 6.9). After pre-incubation, the 1% starch solution (0.5 mL) was added and the reaction mixture was incubated for 30 min at 25 °C. To stop the enzymatic reaction, DNSA reagent (0.5 mL) was added as the color reagent and then incubated in a boiling water bath for 90 min. After cooling down to room temperature, 0.5 mL of samples were diluted to 2.5 mL of distilled water and the absorbance was measured at 540 nm using a UV-visible spectrophotometer. The measured absorbance was compared with that of the control experiment. The percentage inhibition was calculated using the given formula.

$$\% \text{ of Inhibition} = 100 \times [A_c - A_t / A_c]$$

$A_t$ : Absorbance of test

A<sub>c</sub>: Absorbance of control

### Statistical analysis

All experiments were carried out in triplicate. Regressions were made using Sigma-Plot (version 10.0.0.54), except in the case of the spectra graphics, which were made by the spectrofluorimeter software. A T-test was carried out using Rstudio (version 0.99.878) with a significance of  $P < 0.05$ . Other mathematical operations were carried out using wxMaxima (version 12.04.0).

**Table S1.** Anti-inflammation activity of the synthesized compounds (3a to 5a)

| Concentrations<br>( $\mu\text{g/ml}$ ) | Anti-inflammation (% of inhibition) |       |       |       |       |       |       |       |       |       |       |          |
|----------------------------------------|-------------------------------------|-------|-------|-------|-------|-------|-------|-------|-------|-------|-------|----------|
|                                        | 3a                                  | 3b    | 3c    | 3d    | 3f    | 3g    | 3j    | 4a    | 4b    | 4d    | 4g    | Standard |
| 20                                     | 25.43                               | 25.01 | 24.30 | 25.63 | 25.04 | 24.11 | 25.41 | 26.54 | 25.55 | 26.01 | 25.94 | 25.38    |
| 40                                     | 31.33                               | 30.30 | 32.13 | 33.63 | 31.99 | 30.27 | 31.49 | 32.50 | 31.89 | 31.22 | 31.61 | 31.19    |
| 80                                     | 45.51                               | 45.91 | 44.44 | 47.61 | 46.63 | 45.58 | 46.99 | 47.05 | 46.51 | 45.98 | 45.39 | 45.56    |
| 200                                    | 60.53                               | 59.53 | 58.73 | 59.23 | 61.51 | 59.05 | 61.83 | 62.11 | 61.75 | 61.59 | 60.97 | 60.14    |
| 400                                    | 75.31                               | 76.35 | 77.75 | 76.59 | 77.56 | 75.43 | 77.99 | 78.15 | 77.50 | 84.74 | 84.37 | 85.22    |

**Table S2.** Anti-diabetic activity of the synthesized compounds

| Concentrations<br>( $\mu\text{g/ml}$ ) | Anti-diabetic (% of inhibition) |       |       |       |       |       |       |       |       |       |       |          |
|----------------------------------------|---------------------------------|-------|-------|-------|-------|-------|-------|-------|-------|-------|-------|----------|
|                                        | 3a                              | 3b    | 3c    | 3d    | 3f    | 3g    | 3j    | 4a    | 4b    | 4d    | 4g    | Standard |
| 20                                     | 20.89                           | 19.81 | 19.91 | 20.31 | 21.43 | 20.17 | 19.68 | 20.39 | 20.98 | 21.12 | 20.89 | 32.19    |
| 40                                     | 40.48                           | 38.75 | 35.41 | 39.53 | 41.44 | 40.48 | 36.39 | 41.89 | 41.47 | 42.05 | 41.52 | 48.92    |
| 80                                     | 53.27                           | 50.71 | 48.73 | 53.31 | 55.53 | 52.79 | 48.54 | 53.81 | 54.41 | 56.31 | 55.69 | 62.10    |
| 200                                    | 70.38                           | 65.51 | 60.55 | 65.99 | 72.83 | 69.96 | 67.67 | 71.67 | 71.69 | 73.57 | 72.57 | 78.96    |
| 400                                    | 80.25                           | 75.69 | 73.31 | 79.31 | 82.83 | 79.39 | 75.96 | 81.89 | 82.85 | 85.48 | 83.71 | 87.19    |

### 6.0 References:

- S1. P. Muthuraja, M. Saeed Akhtar, P. Gopinath and Y. Rok Lee, *Adv. Synth. Catal.*, 2023, **365**, 4595–4602.
- S2. Y. H. Fan, X. Y. Guan, W. P. Li, C. Z. Lin, D. X. Bing, M. Z. Sun, G. Cheng, J. Cao, J. J. Chen and Q. H. Deng, *Org. Chem. Front.*, 2022, **9**, 380–385.
